# Supplementary material
Source: PubMed Central journal article supplement (PMC3073490)

## Supporting Information

# Fluorinated N,N-Dialkylaminostilbenes for Wnt Pathway Inhibition and Colon Cancer Repression

*Wen Zhang<sup>§†</sup>, Vitaliy Sviripa<sup>§</sup>, Liliia M. Kril<sup>§</sup>, Xi Chen<sup>§†</sup>, Tianxin Yu<sup>§†</sup>, Jiandang Shi<sup>§†</sup>, Piotr Rychahou<sup>#†</sup>, B. Mark Evers<sup>#†</sup>, David S. Watt<sup>§</sup> and Chunming Liu<sup>§†\*</sup>*

<sup>§</sup>Department of Molecular and Cellular Biochemistry, <sup>#</sup>Department of Surgery, and <sup>†</sup>Markey Cancer Center, University of Kentucky, Lexington, KY 40506-0509

**Running Title:** Fluorinated N,N-dialkylaminostilbenes for Wnt pathway inhibition

\*To whom correspondence should be addressed: Phone: 859-323-4558. Fax: 859-257-6030. Email: chunming.liu@uky.edu

### Contents of supporting information:

Copies of the <sup>1</sup>H and <sup>13</sup>C NMR spectra for the compounds described in this work.

LHK-I-189

expl std1h

```
SAMPLE          DEC. & VT
date Jul 31 2010 dfrq 399.719
solvent acetone dn 111
file exp dpwr 42
ACQUISITION dof 0
sfrq 599.719 da nnn c
tn 3.744 dmf 11148
at 44932 dseq
np 6000.6 gres 1.0
fb 3000 homo n
bs 16 PROCESSING
tpwr 59 wtfile
pw 7.3 proc ft
dl 1.000 fn not used
tof 0 math
nt 32 werr
ct 32 wexp
alock n wbs
gain not used wnt
FLAGS
il n
in n
dp y
hs nm
DISPLAY
sp -39.5
wp 4051.0
vs 144
sc 0
wc 250
hzmm 16.20
fs 500.00
rfl 990.3
rfd 0
th 12
ins 6.000
nm cdc ph
```

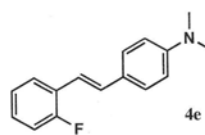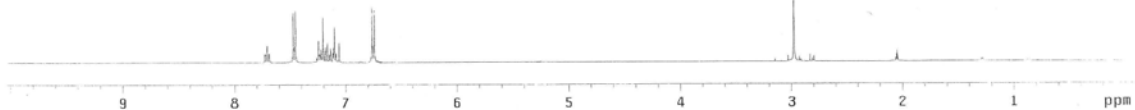

```

LMK-I-189
expl std13c
SAMPLE DEC. & VT
date Jul 31 2010 dfrq 399.719
solvent Acetone dn H1
file exp dpwr 42
ACQUISITION exp dof 0
sfrq 100.519 dm yyy
tn C13 dsm w
at 0.800 def 11148
np 40000 dseq
sw 25000.0 dres 1.0
fb 14000 homo n
bs 16 PROCESSING n
tpwr 56 lb 1.00
pw 6.0 wtfile
di 1.000 proc ft
tof 0 fn not used
nt 32000 math
ct 8288
alock n verr
gain not used wexp
FLADS n wbs
fl n wnt
fn n
dp y
hs nn
DISPLAY
sp -192.8
wp 22003.0
vs 1044
sc 0
wc 250
hzem 88.02
is 500.00
rf1 2989.0
rtp 0
th 12
ins 100.000
na no ph

```

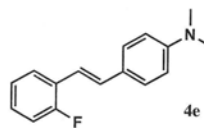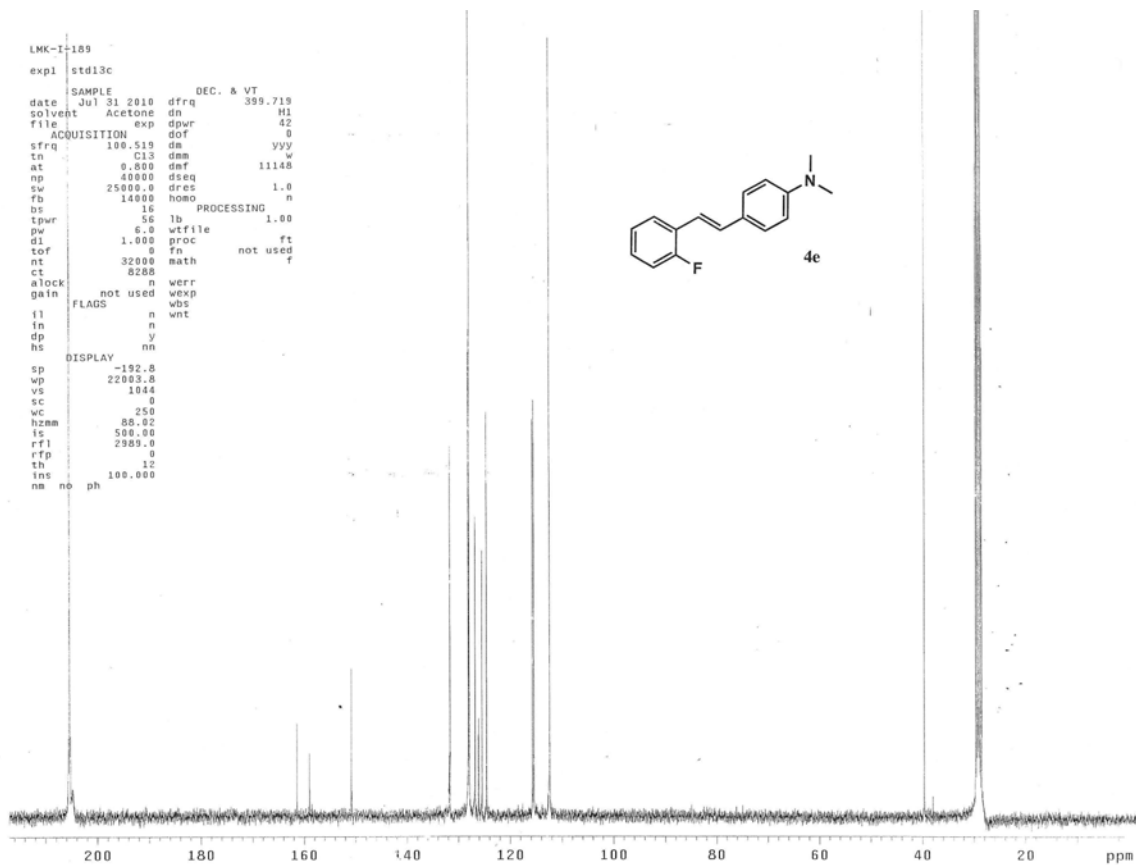

```

LMX-I-193
expl std1h
SAMPLE DEC. & VT
date Aug 4 2010 dfrq 399.719
solvent Acetone dn HI
file exp dpwr 42
ACQUISITION dof 0
sfrq 399.719 ds nnn
tn HI dsm c
at 3.744 def 11148
np 44932 dseq
sw 6000.6 dres 1.0
fb 3000 homo n
bs 16 PROCESSING
tpwr 59 wfile
pw 7.3 proc ft
d1 1.000 fn not used
tof 0 math f
nt 32
ct 32 werr
alock n wexp
gain not used wbs
FLAGS n wnt
il n
in n
dp y
hs nn
DISPLAY
sp -35.0
wp 4082.9
vs 144
sc 0
vc 250
hzam 16.33
is 500.00
rfl 1001.7
rfp 0
th 9
ins 1.000
nm cdc ph

```

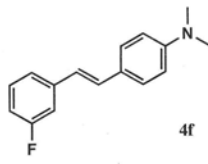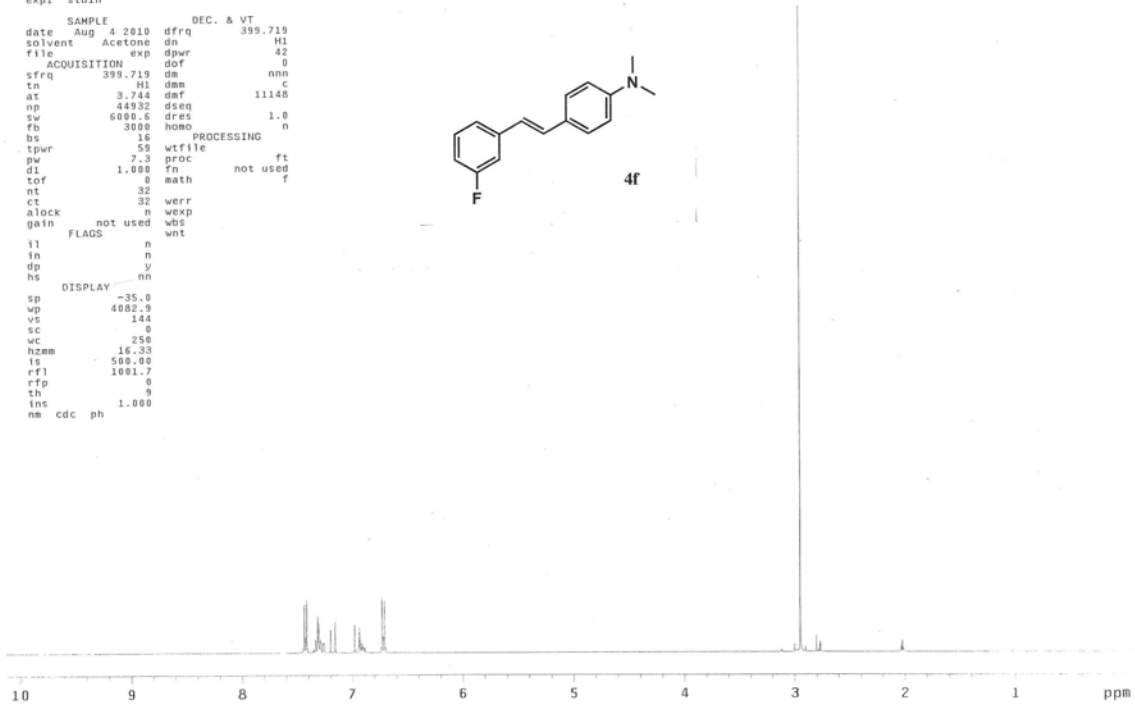

```

LMK-I-193
expl  std13c
SAMPLE      DEC. & VT
date  Aug 4 2010  dfrq  399.719
solvent  Acetone  dn      HI
file     exp     dpwr   42
ACQUISITION  dof      0
sfrq    100.519  dm      yyy
tn       C13    dnm     w
et       0.000  def     11148
np       40000  dseq    1.0
sw       25000.0  dret   n
fb       14000  hobo    n
bs       16     PROCESSING
tpwr     56     lb      1.00
pw       6.0   wtfile
d1       1.000  proc   ft
tof      0     fn     not used
nt       32000  math   f
ct       17696
alock    n     werr
gain     not used  wexp
FLAGS    n     wnt
ii       n
in       n
dp       y
hs       nn
DISPLAY
sp       -2989.0
wp       25000.0
vs       559
sc       0
wc       250
hzem     100.00
is       500.00
rf1      2989.0
rfp      0
th       20
ins      100.000
na       no  ph

```

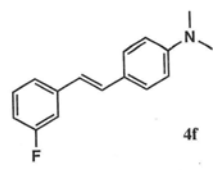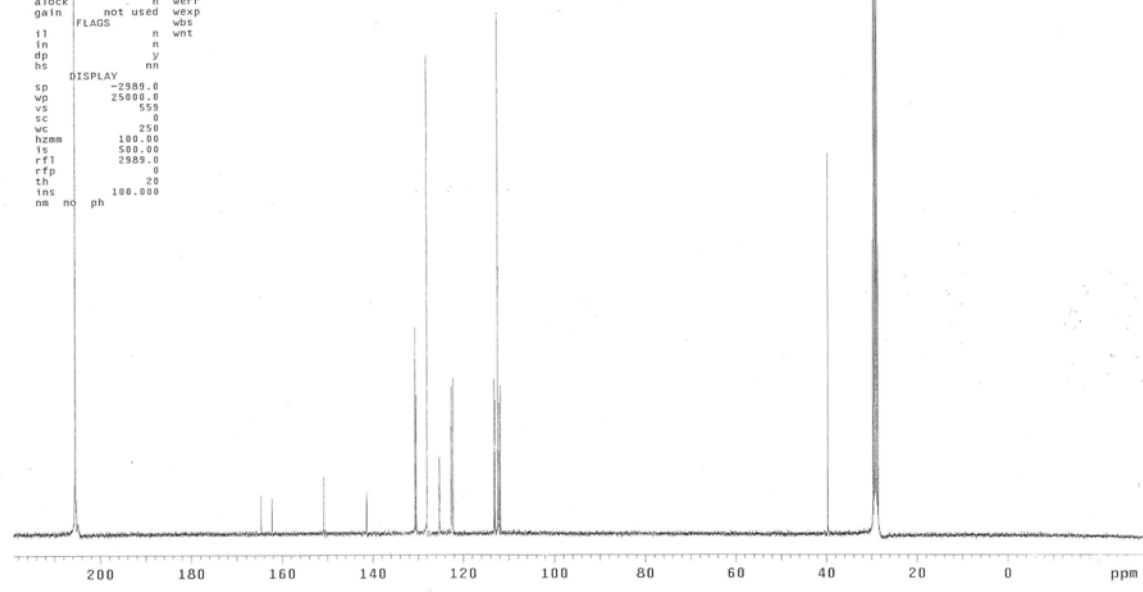

```

LMK-I-65
expl stdih
SAMPLE DEC. & VT
date Aug 3 2010 dfrq 399.719
solvent Acetone dn H1
file exp dpwr 42
ACQUISITION exp dof 0
sfrq 399.719 ds nnn
tn H1 dms c
at 3.744 def 11146
np 44932 dseq
sw 6000.6 dres 1.0
rb 300 hsmo n
bs 16 PROCESSING
tpwr 59 wtfle
pv 7.3 proc ft
dl 1.000 fn not used
tof 0 math f
nt 32
ct 32 werr
alock n wexp
gain not used wds
FLAGS wnt
ll n
in n
dp y
hs nn
DISPLAY
sp -59.0
wp 4090.9
vs 200
sc 0
wc 250
hznm 16.36
is 500.00
rfl 1001.7
rfp 0
th 20
ins 100.000
nm cdc ph

```

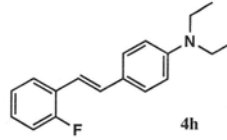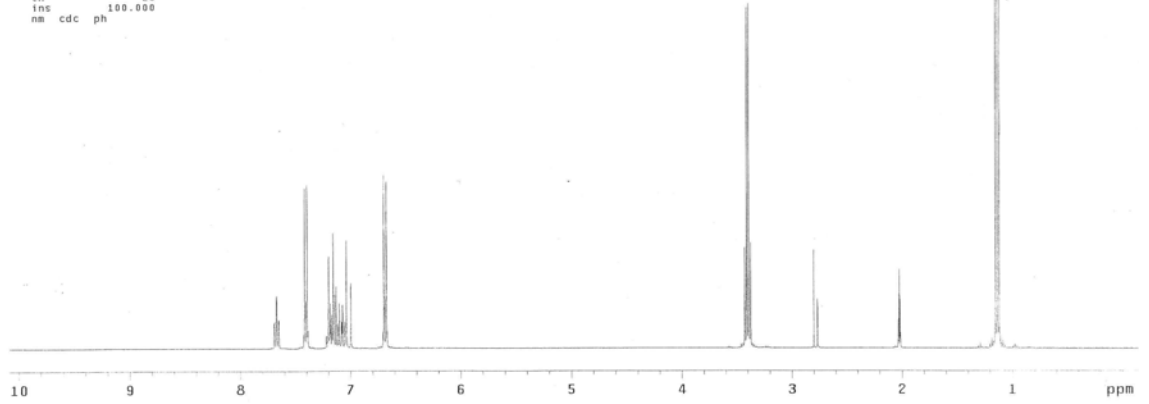

```

LMK-I-05
expl std13c
SAMPLE DEC. & VT
date Aug 19 2010 dfrq 399.719
solvent Acetone dn M1
file exp dpr 42
ACQUISITION exp dof 0
sfrq 100.519 da yyv
tn C13 dam w
at 0.000 def 11148
np 40000 dseq
sw 25000.0 dres 1.0
fb 14000 homo n
bs 16 PROCESSING
tpwf 56 lb 1.00
pv 5.0 wfile
d1 1.000 proc ft
tof 0 fa not used f
nt 32000 math
ct 17126
alock n werr
gain not used wexp
FLAG n wbs
ll n wnt
ln n
dp y
hs nn
DISPLAY
sp -226.4
wp 22236.5
vt 1038
sc 0
wc 250
hzmm 88.95
is 500.00
rfl 2989.0
rfp 0
th 5
ins
nm no ph

```

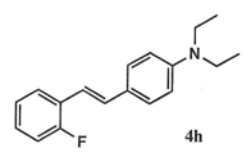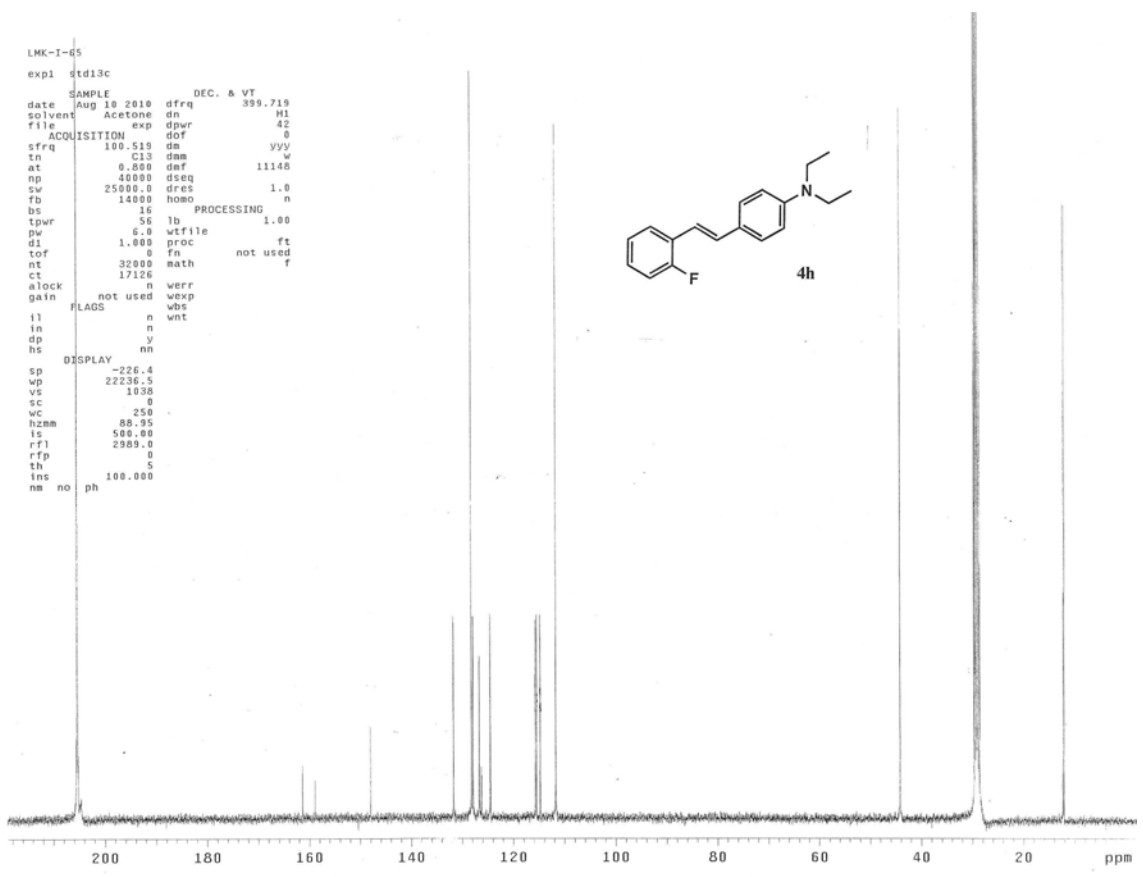

```

LMK-I-73
expl stdih
SAMPLE DEC. & VT
date Aug 9 2010 dfrq 399.719
solvent Acetone dn HI
file exp dpwr 42
ACQUISITION dof 0
sfrq 399.719 dm nnn
tn H1 dm c
at 3.744 def 11140
np 44932 dseq
sw 8000.6 dres 1.0
rb 300 homo n
bs 16 PROCESSING
tpwr 59 wtf file ft
pv 7.3 proc not used
dl 1.000 fn
tof 0 math f
nt 12
ct 12 werr
alock n wexp
gain not used wbs
FLAGS n wnt
in n
dp y
hs nn
DISPLAY
sp -26.9
wp 4034.9
vs 119
sc 0
wc 250
hzm 16.14
is 500.00
rfl 1001.7
rfp 0
th 20
ins 100.000
nm cdc ph

```

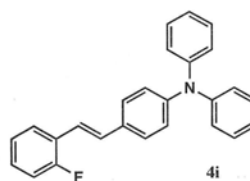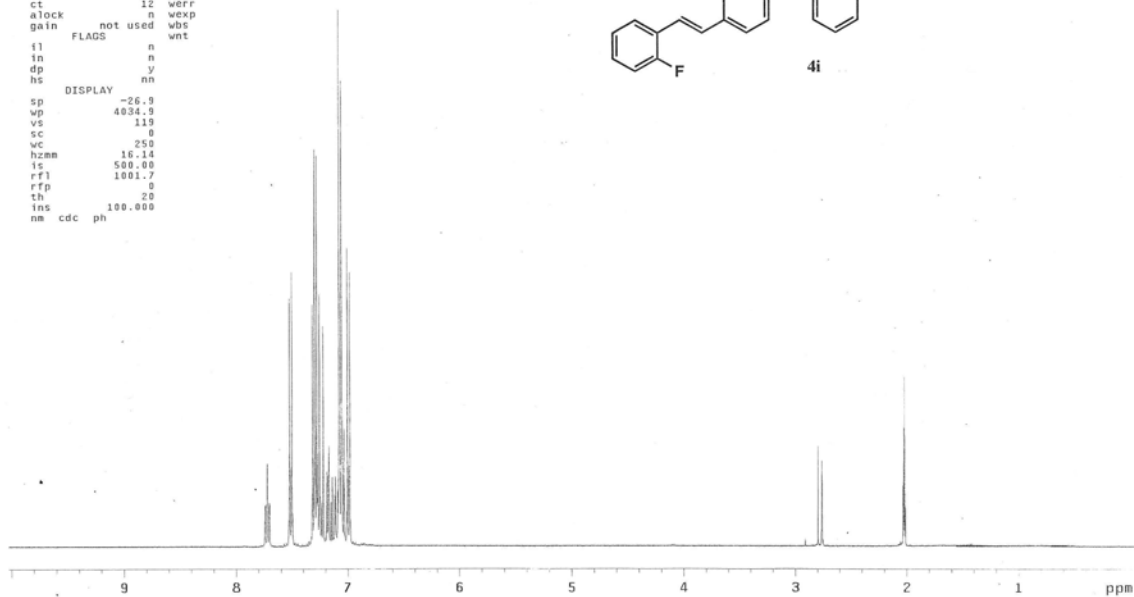



```

LMK-I-73
expl std13c
SAMPLE DEC. & VT
date Aug 9 2010 dfrq 399.719
solvent Acetone dn H1
file exp dpwr 42
ACQUISITION dof 0
sfrq 100.519 dm yyv
tn C13 dmm w
at 0.000 def 11148
np 40000 dseq
sw 25000.0 dres 1.0
fb 14000 hmc n
bs 16 PROCESSING n
tpwr 56 lb 1.00
pw 6.0 wfile
d1 1.000 proc ft
tof 0 fn not used f
nt 32000 math
ct 7136
alock n werr
gain not used wexp
FLAGS n wbs
il n wnt
in n
dp y
hs nn
DISPLAY
sp -93.6
wp 21903.9
vs 92.7
sc 0
wc 250
hzam 87.62
is 500.00
rf 2989.0
rtf 0
th 5
ins no ph 100.000
nm

```

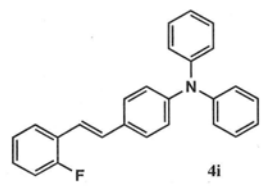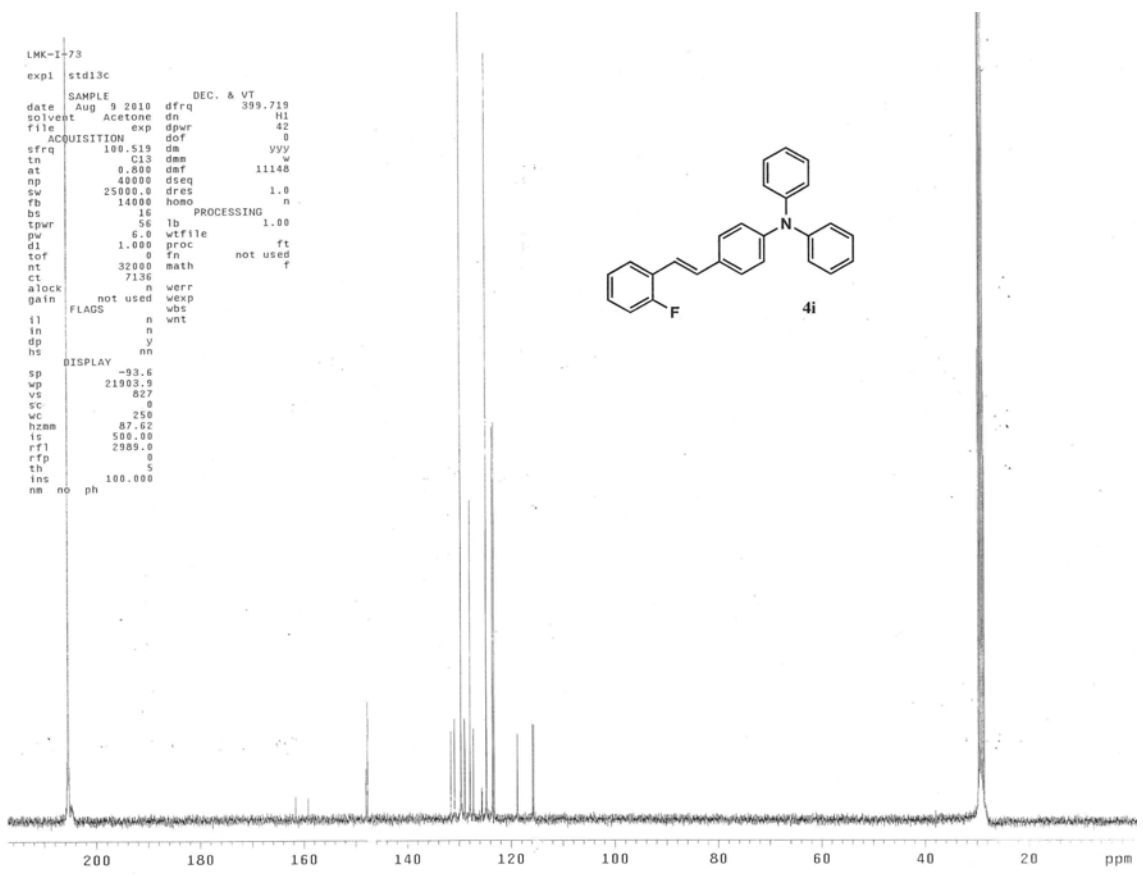

```

LMK-I-87
expl std1h
SAMPLE DEC. & VT
date Aug 4 2010 dfrq 399.719
solvent Acetone dn HI
file exp dpwr 42
ACQUISITION dof 0
sfrq 399.719 da nnn
tn HI dm C
et 3.744 def 11148
np 44932 dseq
sw 4000.0 dret 1.0
fb 3000 homo n
bs 16 PROCESSING
tpwr 59 wffile
pw 7.3 proc ft
d1 1.000 fn not used
tof 0 math f
nt 8
ct 8 werr
alock n wexp
gain not used vbs
FLAGS wnt
il n
in n
dp y
hs nn
DISPLAY
sp 13.0
wp 4010.0
vs 200
sc 0
wc 250
hzam 16.04
is 500.00
rf1 1001.7
rfp 0
th 20
ins 100.000
na cdc ph

```

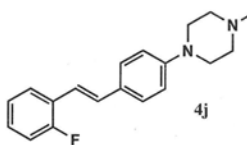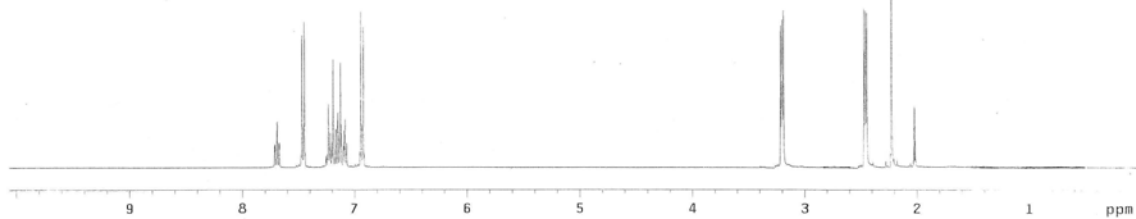

```

LHK-I-87
expl std13c
SAMPLE DEC. & VT
date AUG 4 2010 dfrq 399.719
solvent Acetone dn H1
file exp dpwr 42
ACQUISITION dof 0
sfrq 100.519 dm yyy
tr C13 dms w
ax 0.800 daf 11148
ng 40000 dseq
sw 25000.0 dres 1.0
fs 14000 homo n
bs 1c PROCESSING n
tpwr 56 lb 1.00
ps 6.0 wtfile
d3 1.000 proc ft
tof 0 fn not used
ns 32000 math
cs 8736
alock n verr
g4in not used wexp
FLAGS n wnt
in n
dp y
hs nn
DISPLAY
sp -250.9
wp 21571.2
vs 700
sc 0
wc 250
hsm 86.20
is 500.00
rfl 2989.0
rtp 0
th 20
ins 100.000
ns no ph

```

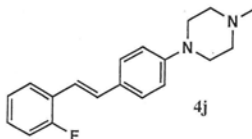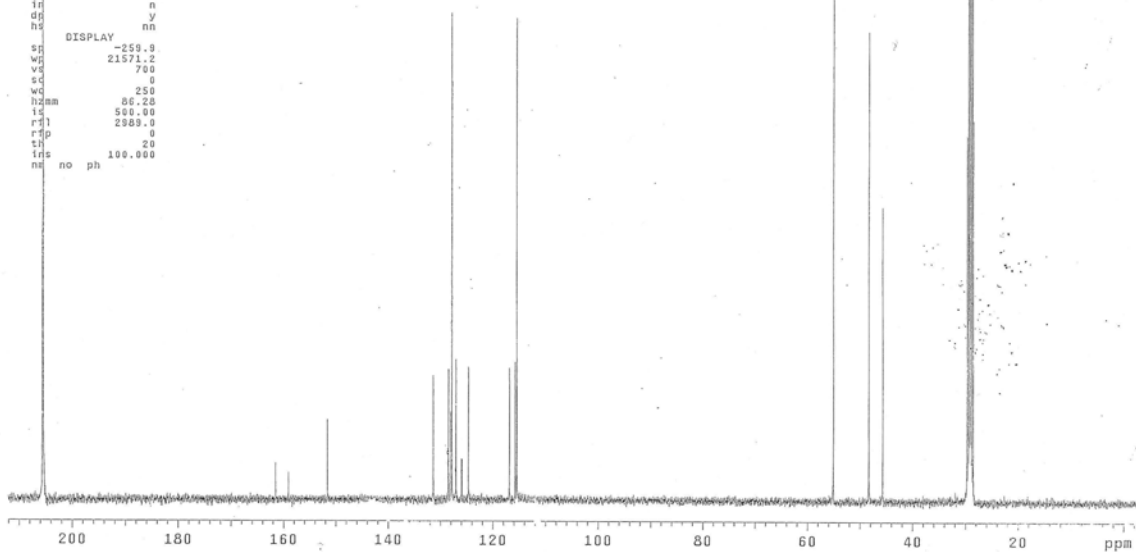

```

LMK-I-67
expl stdih
SAMPLE
date Aug 2 2010 dfrq DEC. & VT 399.719
solvent Acetone dn H1
file ACQUISITION exp dpwr 42
sfrq 399.719 dm nnn
tn H1 dnm C
at 3.744 def 11148
np 44932 dseq
sw 6086.6 dres 1.0
fb 3000 hobo n
bs 16 PROCESSING
tpwr 59 wtf file
pw 7.3 proc ft
d1 1.000 fn not used
tof 0 math f
nt 32
ct 32 werr
alock n wexp
gain not used wbs
flags not used wnt
il n
in n
dp y
hs nn
DISPLAY
sp -16.2
wp 4051.0
vs 516
sc 0
wc 250
hcam 16.20
is 500.00
rf1 1810.4
rtg 819.4
th 12
ins cdc ph 6.000

```

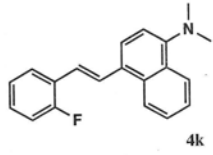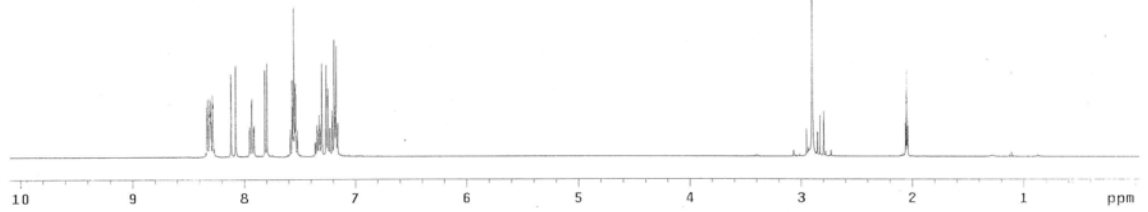

```

LMK-1-67
exp1 std13c
SAMPLE DEC. & VT
date Aug 2 2010 dfrq 399.719
solvent Acetone dn H1
file exp dpwr 42
ACQUISITION dof 0
sfrq 100.519 dm yyy
tn C13 dm w
axi 0.000 dmf 11148
npi 40000 dseq
sw 25000.0 dres 1.0
fb 14000 homo n
bs 16 PROCESSING n
tpr 56 lb 1.00
pw 6.0 wfile
d1 1.000 proc ft
tof 0 fn not used f
nt 32000 math
ct 26112
alock n verr
gain not used wexp
FLAGS n wbs
i1 n wnt
in n
dps y
hs nn
DISPLAY
sp 39.9
wp 21304.2
vs 1004
sc 0
wci 250
hznm 85.22
ls 500.00
rft 2909.0
rtp 0
th 0
ins 100.000
nm no ph

```

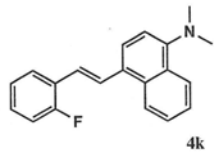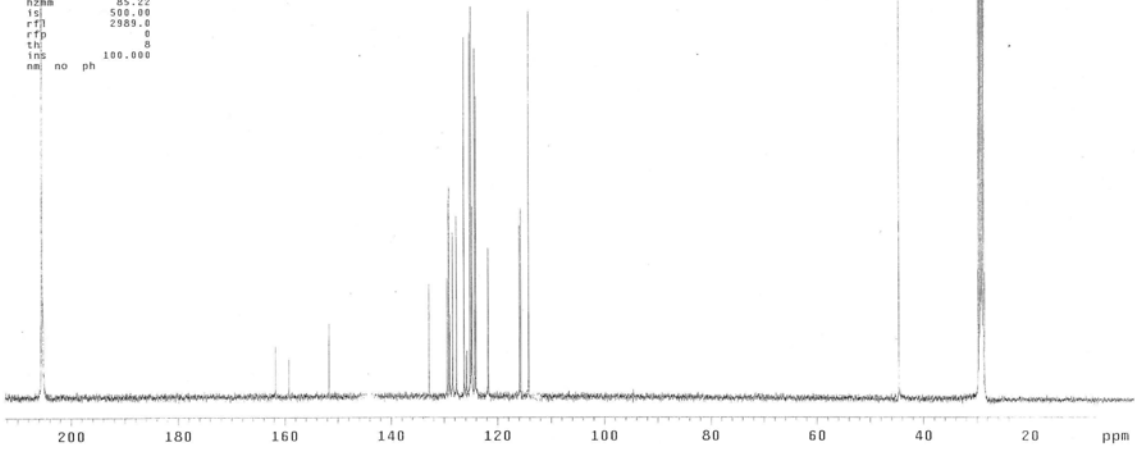

LMK-I-77

exp2 std1h

```
SAMPLE          DEC. & VT
date Nov 18 2010 dfrq 399.719
solvent Acetone  dn  H1
file exp dpwr 42
ACQUISITION dot 0
sfrq 399.719 dm nnn
tn H1 dm c
at -3.744 daf 11148
np 44932 dseq
sw 6000.6 dres 1.0
fb 3000 homo n
bs lc PROCESSING
tpwr 59 wfile
pw 7.3 proc ft
di 1.000 Fn not used
tof 0 math f
nt 32
ct 32 werr
alock n wexp
gain not used wbt
FLAGS not used wnt
il n
in n
dp y
hs nn
DISPLAY
sp -98.6
wp 4103.2
vs 106
sc 0
wc 250
hzam 16.41
fs 500.00
rf1 1001.7
rfp 0
th 20
ins 100.000
nm cdc ph
```

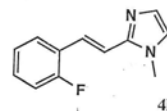

(in CD<sub>3</sub>COCD<sub>3</sub>)

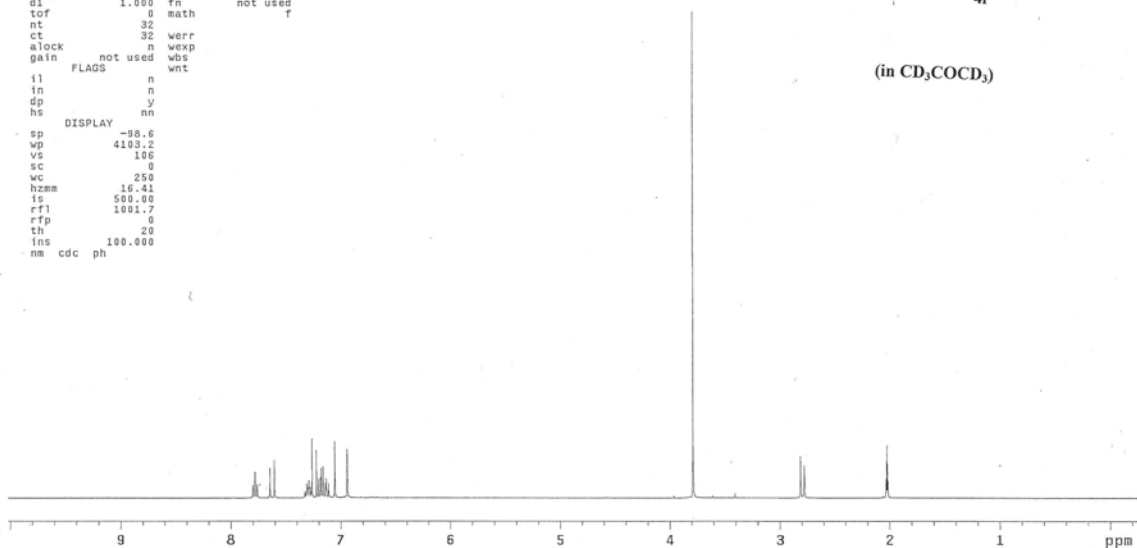

```

LMK-I-77
exp2 s2pu1
SAMPLE DEC. & VT
date Nov 17 2010 dfrq 399.719
solvent acetone dn HI
file exp spwr 42
ACQUISITION dof 0
sfrq 198.519 dm vvy
tn C13 dm w
at 0.000 def 11148
np 40000 dseq
sw 25000.0 dres 1.0
fb 14000 homo n
bs 16 PROCESSING n
tpvr 56 lb 1.00
pw 6.0 wfile
di 1.000 proc ft
tof 0 Tn not used
nt 32000 math f
ct 27000
alock n verr
gain 60 wexp
FLAGS n wbt
i1 n
in n
ap y
hs nn
DISPLAY
sp -2944.0
wp 25000.0
vs 1892
sc 0
wc 250
hzmm 100.00
ls 500.00
rf1 2944.0
rfp 0
th 58
ins 100.000
na no ph

```

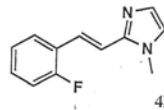

(in CD<sub>3</sub>COCD<sub>3</sub>)

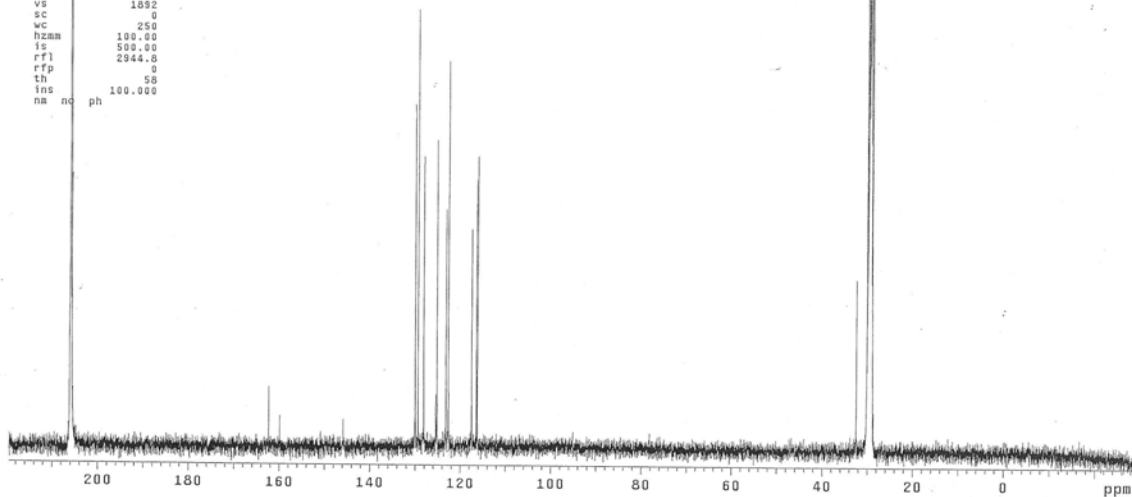

LMK-I-77

expl stdih

```
SAMPLE DEC. & VT
date Nov 15 2010 dfrq 399.719
solvent CD3CN dn H1
file exp dpwr 42
ACQUISITION dof 0
sfrq 399.719 dm nnn
tn H1 dam c
at 3.764 def 11148
np 44932 dseq
sw 6000.6 dres 1.0
fb 3000 homo n
bs 16 PROCESSING
tpwr 59 wfile
pw 7.3 proc ft
dl 1.000 fe not used
tof 0 math f
nt 12
ct 12 werr
alock n wexp
gain not used wbs
FLADS wnt
il n
in n
dp y
hs nn
DISPLAY
sp 11.3
wp 3979.2
vs 200
sc 0
wc 250
hzmm 15.92
ls 500.00
rfl 1774.7
rfp 775.5
th 20
lms 100.000
na cdc ph
```

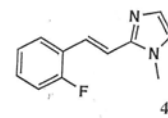

(in CD<sub>3</sub>CN)

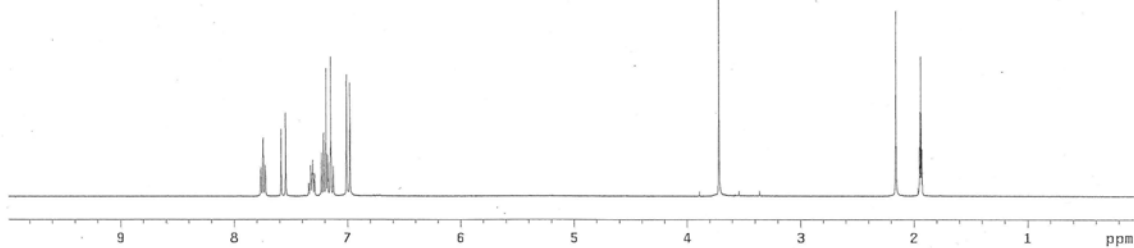



```

LMK-I-77
expl std13c
SAMPLE DEC. & VT
date Nov 14 2010 dfrq 399.719
solvent CD3CN dn HI
File exp dpwr 42
ACQUISITION dof 0
sfrq 100.519 dm yyy
tn C13 dnm w
at 0.800 def 11148
np 48000 dseq
sw 25000.0 dres 1.0
fb 14000 homo n
bs 16 PROCESSING n
tpwr 56 lb 1.00
pw 6.0 wtf1le
d1 1.000 proc ft
tof 0 fn not used
nt 32000 math
ct 20192
alock n werr
gain not used wexp
FLAOS n wbs
il n wnt
in n
up y
hs n
DISPLAY
sp -1048.9
wp 21110.0
vs 1230
sc 0
wc 250
hzmm 84.47
ls 500.00
rf1 2989.1
rfp 0
th 22
ins 100.000
nm no ph

```

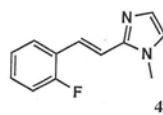

(in CD<sub>3</sub>CN)

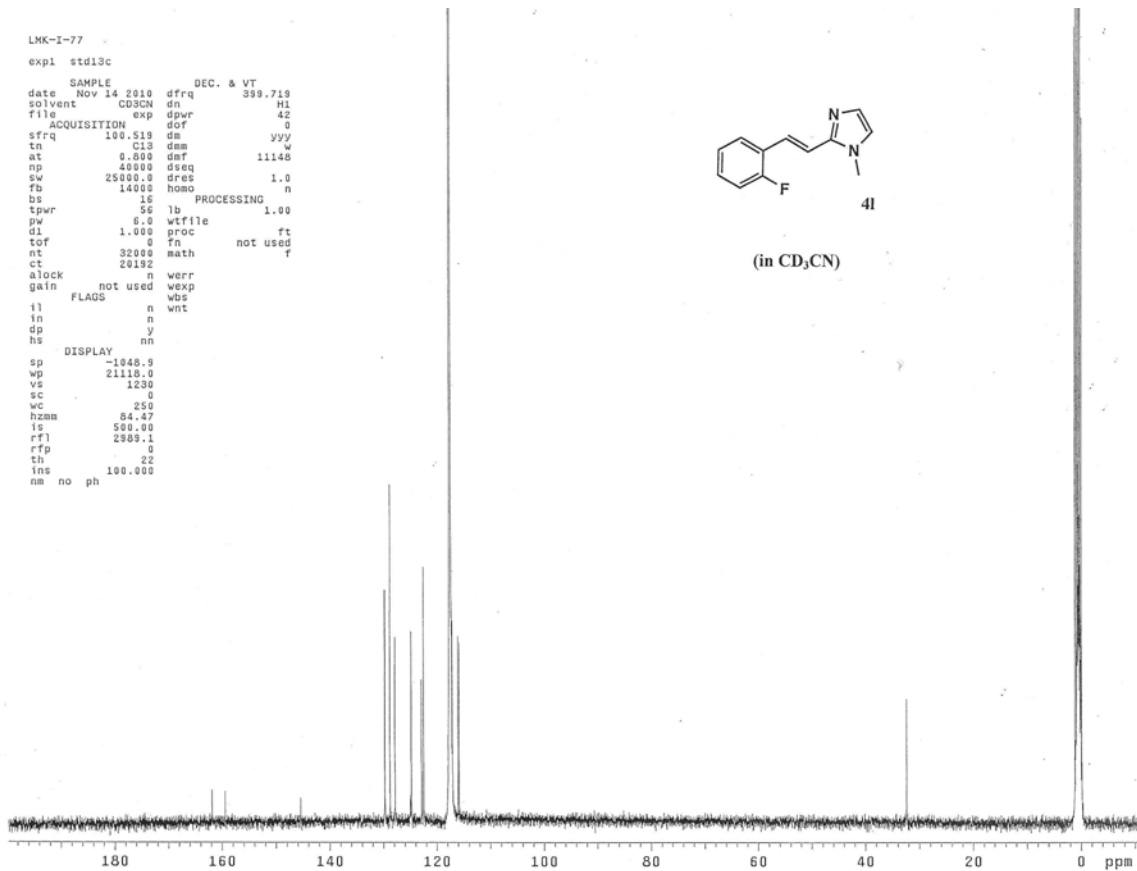

```

LMK-1-195
expl std1h
SAMPLE DEC. & VT
date Aug 12 2010 dfrq 399.719
solvent Acetone dn H1
file exp dpr 42
ACQUISITION dof 0
sfrq 399.719 dm nnn
tn H1 dsm c
at 3.744 dmf 11148
np 44932 dseq
sw 6080.6 dres 1.0
fb 3000 homo n
bs 16 PROCESSING
tpwr 59 wtfle
pw 7.3 proc ft
d1 1.000 fn not used
tof 0 math f
nt 12
ct 12 werr
alock n wexp
gain not used wdr
FLADS wnt
il n
in n
dp y
hs nn
DISPLAY
sp -59.0
vp 4074.8
vs 200
sc 0
wc 250
hzam 16.30
is 500.00
rf1 1001.7
rfp 0
th 20
ins 100.000
na cdc ph

```

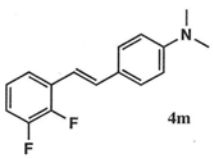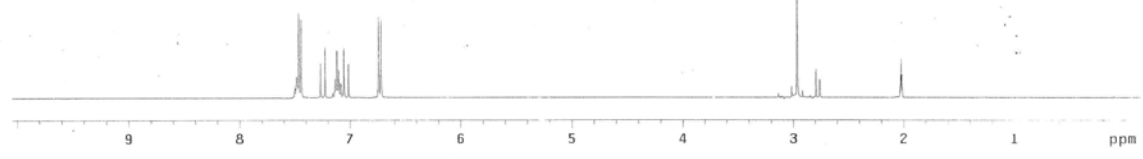

```

LMK-1-199
expl std13c
SAMPLE DEC. & VT
date Aug 11 2010 dfrq 399.719
solvent Acetone dn H1
file exp dpwr 42
ACQUISITION dof 0
sfrq 100.519 dm yyy
tn C13 dmm v
at 0.000 def 11148
np 40000 dseq
sw 25000.0 dret 1.0
fb 14000 homo n
bs 16 PROCESSING n
tpwr 56 lb 1.00
pw 6.0 wtfile
d1 1.000 proc ft
tof 0 fn not used
nt 32000 math f
ct 17504
alock n verr
gain not used wexp
FLADS wbs
il n wnt
in n
dp y
hs nn
DISPLAY
sp -2989.0
wp 25000.0
vs 1363
sc 0
wc 250
hcam 20.12
is 500.00
rf1 2989.0
rfp 0
th 20
ins no ph 100.000
nm

```

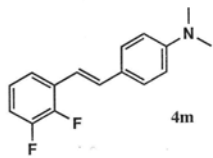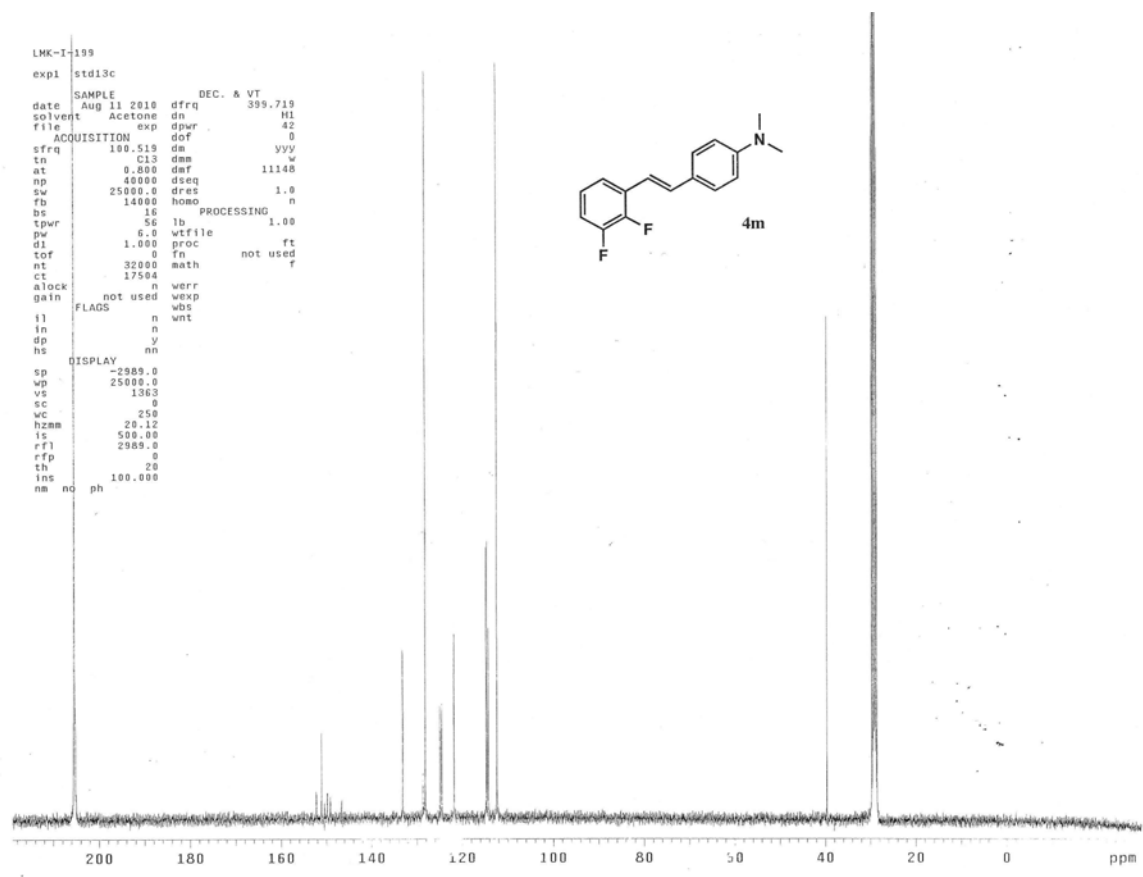

```

LMK-1-197
expl stdlh
SAMPLE DEC. & VT
date AUG 5 2010 dfrq 399.719
solvent Acetone dn H1
file exp dpr 42
ACQUISITION
sfrq 399.719 dm nnn
in H1 dsm c
at 3.744 dmf 11148
np 44932 dseq
sw 6000.6 dres 1.0
fb 3000 homo n
bs 16 PROCESSING n
tpwr 59 wfile
pw 7.3 proc ft
dl 1.000 fn not used f
tof 0 math
nt 32
ct 32 werr
alock n wexp
gain not used lbs
FLAGS wnt
il n
in n
dp y
hs nn
DISPLAY
sp -0.1
wp 4027.0
vs 144
sc 0
wc 250
hzmm 16.11
fz 175.37
rf1 1810.2
rfp 819.4
th 0
ins 6.000
nm cdc ph

```

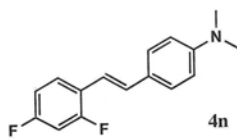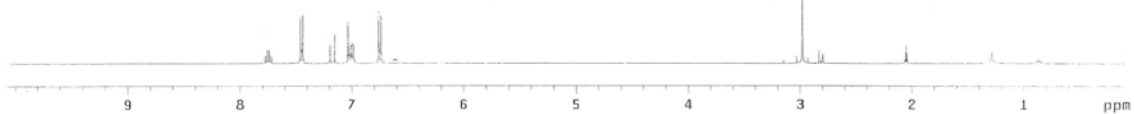

```

LMK-1-197
expl std13c
SAMPLE DEC. & VT
date Aug 5 2010 dfrq 399.719
solvent Acetone dn H1
file exp dpvr 42
ACQUISITION dof 0
sfrq 100.519 dm 9yy
tn C13 dmm w
at 0.000 dmf 11148
np 40000 dseq 1.0
sw 25000.0 dres n
fb 14000 homo
bs 16 PROCESSING
tpwr 56 lb 1.00
pw 6.0 wfile
d1 1.000 proc ft
tof 0 fn not used
nt 32000 math r
ct 18192
alock -n werr
gain not used wexp
FLAGS n wbs
il n wnt
in n
dp y
hs nn
DISPLAY
sp -2989.0
wp 25000.0
vs 006
sc 0
wc 250
hzem 100.00
is 500.00
rfl 2989.0
rfp 0
th 7
ins no ph 100.000
nm

```

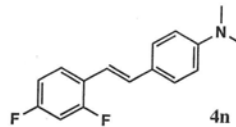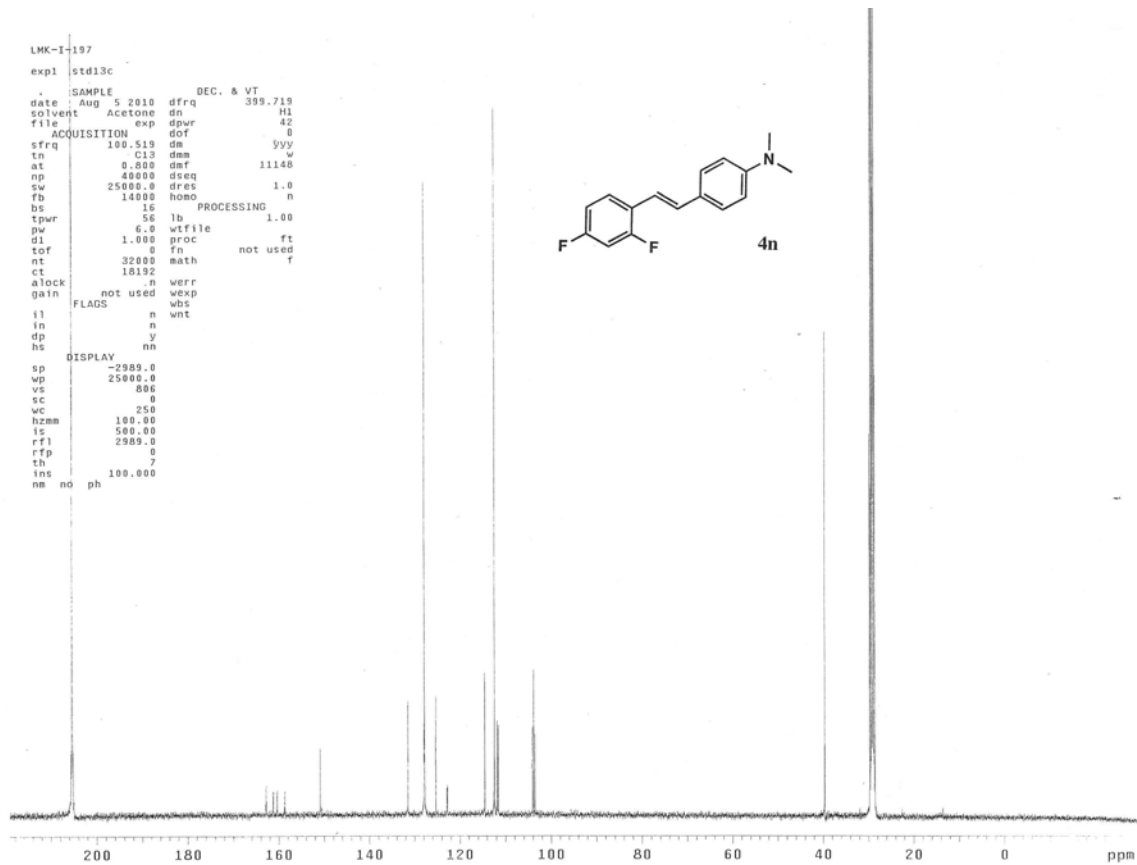

```

LMK-I-201
expl stdih
SAMPLE DEC. & VT
date Aug 13 2010 dfrq 399.719
solvent Acetone dn H1
file exp dpar 42
ACQUISITION dof 0
sfrq 399.719 dm nnn
in H1 dsm c
at 3.744 dmf 11148
np 44932 dseq 1.0
sw 6000.6 dres n
fb 3000 homo n
bs 16 PROCESSING
tprw 59 wtitle ft
pw 7.3 proc not used
d1 1.000 fn f
tof 0 math
nt 32
ct 32 verr
alock 0 wexp
gain not used vbs
FLAGS wnt
il n
in n
dp y
hs nn
DISPLAY
sp -24.6
wp 4042.3
vs 144
sc 0
wc 250
hzmm 16.17
is 500.00
rfl 1810.3
rfp 819.4
th 6
ins
nm cdc ph 1.000

```

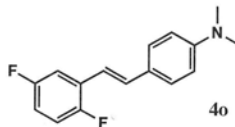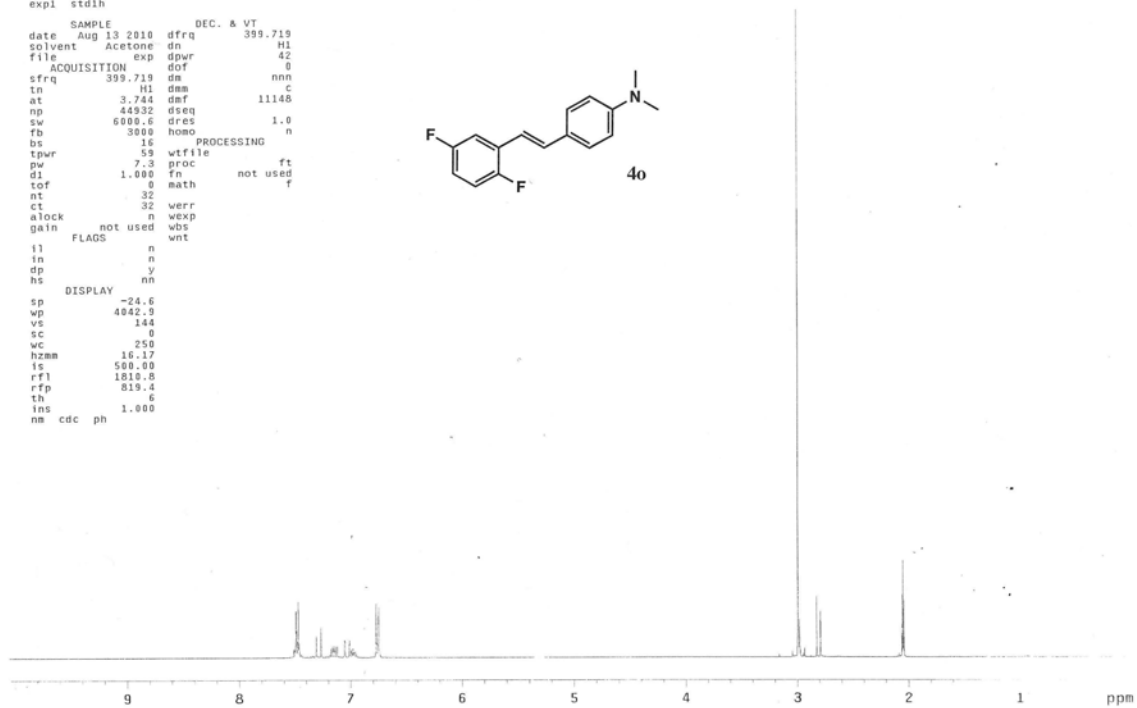

```

LMK-I-201
expl   std13c
      SAMPLE          DEC. & VT
date   Aug 13 2010  dfrq   399.719
solvent Acetone     dn      H1
file   exp         dpr    42
      ACQUISITION
sfrq   100.519    dm      yyy
tn     C13       dnm     w
et     0.800    dmf     11148
np     40000    dseq
sw     25000.0  dres   1.0
fd     14000    hobo   n
bs     16      PROCESSING
tpwr   56      lb      1.00
pw     6.0    wtfile
d1     1.000  proc   ft
tof    0      fn     not used
nt     32000  math   f
ct     32000
alock  n      werr
gain   not used wexp
      FLAGS      wbs
il     n      wnt
in     n
dp     y
hs     nm
      DISPLAY
sp     139.9
wp     21604.1
vs     3892
sc     0
wc     250
hzmm   86.42
is     500.00
rf1    2989.0
rfp    0
th     20
ins
nm     np     ph  100.000

```

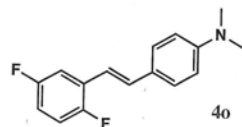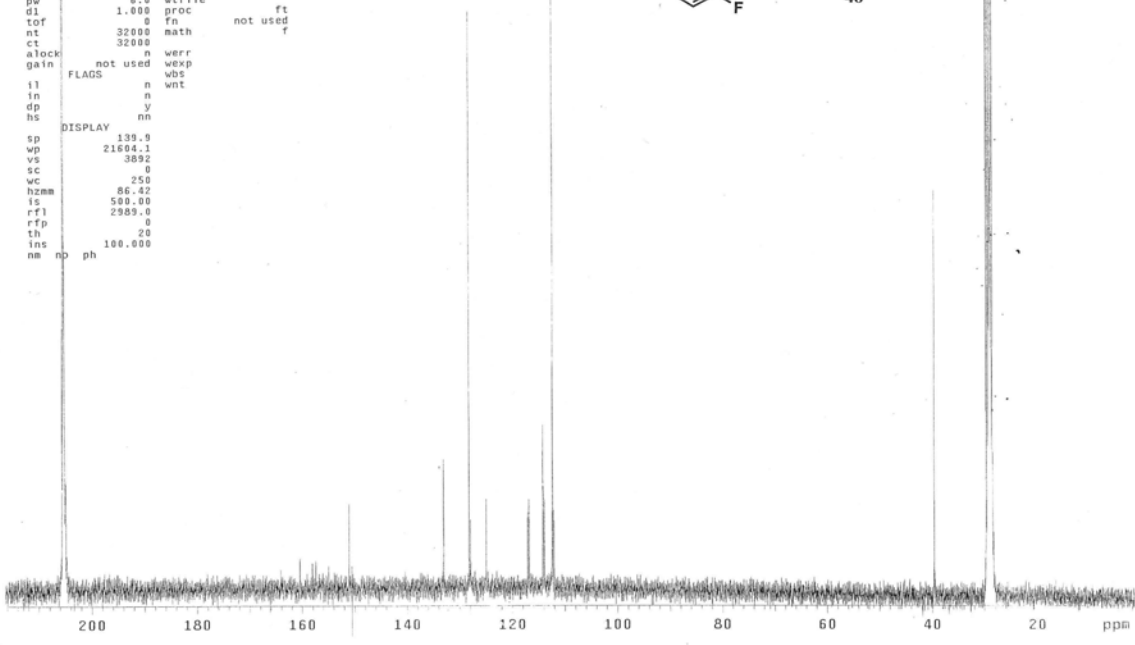

```

LMK-I-209
expl stdih
SAMPLE DEC. & VT
date Aug 20 2010 dfrq 399.719
solvent Acetone dn H1
file exp dpwr 42
ACQUISITION exp dof 0
sfrq 399.719 da nnn
in H1 dsm c
at 3.744 daf 11148
np 44932 dseq 1.0
sw 8000.6 dres n
rb 3000 hobo n
bs 16 PROCESSING
tpwr 59 wtfle ft
pw 7.3 proc not used
d1 1.000 fn f
tof 0 math r
nt 32
ct 32 werr
alock n wexp
gain not used wst
FLAGS n wnt
il n
in n
dp y
hs nn
DISPLAY
sp 7.8
wp 3995.0
vs 144
sc 0
wc 250
hzmm 15.98
is 102.98
rf1 990.0
rfp 0
th 48
ins 1.000
nm cdc ph

```

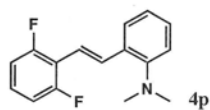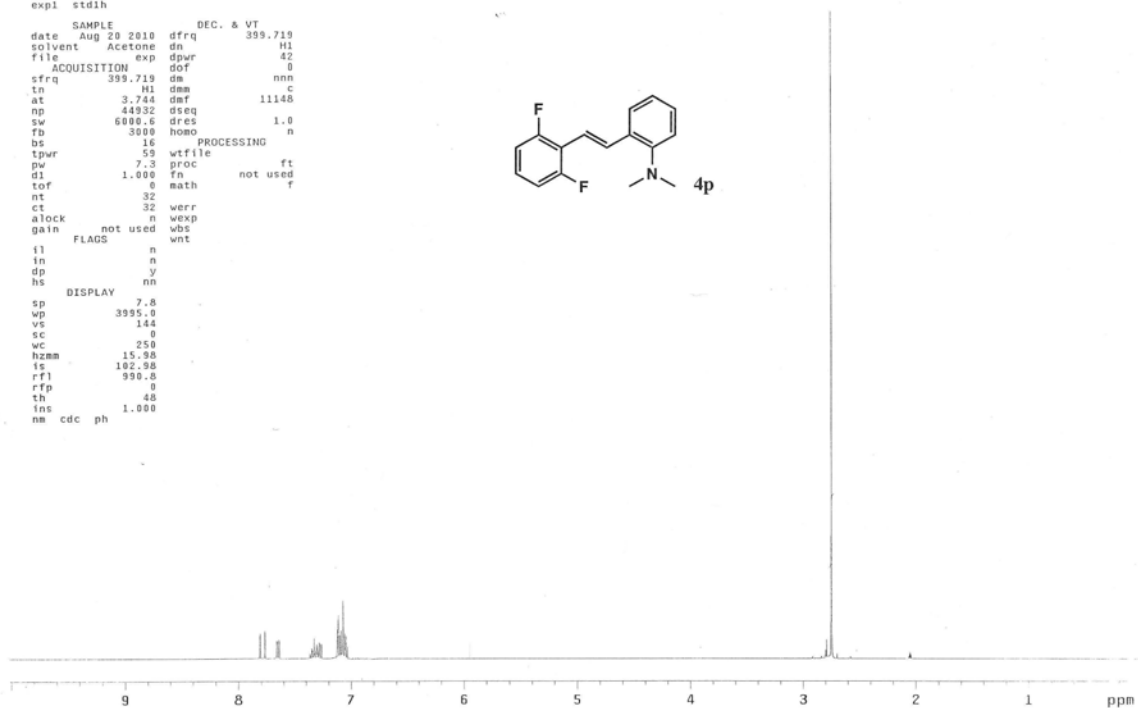



```

LMK--209
expl std13c
SAMPLE DEC. & VT
date Aug 20 2010 dfrq 399.719
solvent Acetone dn H1
file exp dpur 42
ACQUISITION exp dof 0
strq 100.519 da yvy
tn 0.13 dms w
at 0.800 dnf 11148
np 40000 sseq
sw 25000.0 dres 1.0
fb 14000 homo n
bs 16 PROCESSING n
tpwr 56 lb 1.00
pw 6.0 vtfile
d1 1.000 proc ft
tof 0 tn not used
nt 32000 math
ct 31248
aloc not used werr
gain not used wexp
FLAGS n wbs
in n wnt
dp y
hs nn
DISPLAY
sp -126.4
wp 21683.3
vs 249
sc 0
wc 258
hzmm 87.22
is 508.00
rfj 2888.0
rfp 0
th 20
ins 100.000
nm so ph

```

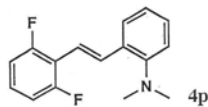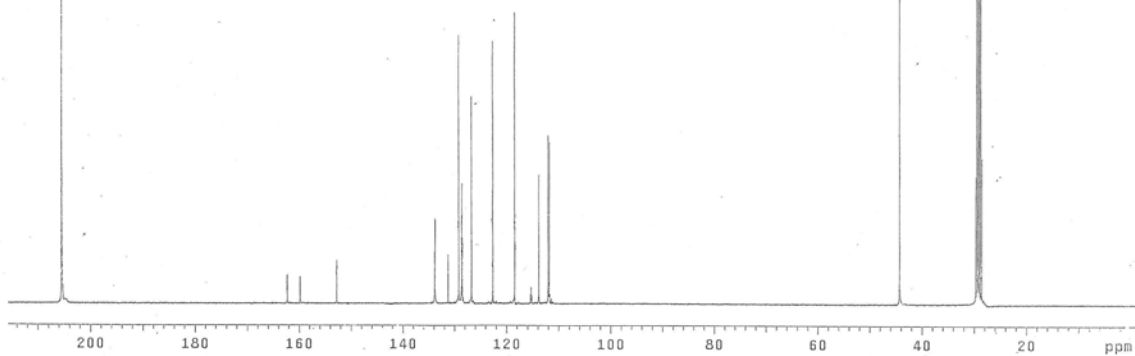

```

LMK-1-207
expl stdih
SAMPLE DEC. & VT
date Aug 14 2010 dfrq 399.719
solvent Acetone dn H1
file ACQUISITION exp dpwr 42
sfrq 399.719 dm nnn
tn H1 dnm C
at 3.744 def 11148
np 44932 dseq
sw 6000.6 dret 1.0
fb 3000 homo n
bs 16 PROCESSING
tpwr 59 utfile ft
pw 7.3 proc
d1 1.000 fn not used
tof 0 math f
nt 32
ct 32 verr
alock n wexp
gain not used vbs
FLAGS not used wnt
il n
in n
dp y
hs nn
DISPLAY
sp 4.9
wp 4010.9
vs 505
sc 0
wc 250
hzam 16.04
is 500.00
rf1 1001.7
rfp 0
th 59
ins
nm cdc ph

```

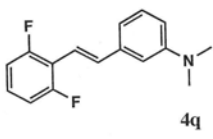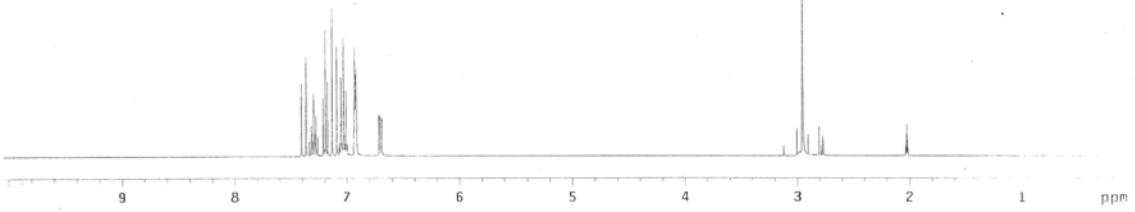

```

LMK-2-207
expi std13c
SAMPLE DEC. & VT
date AUG 14 2010 dfrq 399.719
solvent Acetone dn H1
file exp dpr 42
ACQUISITION dot 0
sfrq 100.519 da yvy
In C13 dsm w
at 0.800 dmf 11148
np 40000 dseq
pw 25000.0 dres 1.0
Tb 14000 homo n
ds 16 PROCESSING
tpwr 56 lb 1.00
pw 6.0 wfile
d1 1.000 proc ft
tof 0 Tn not used f
nt 32000 math
ct 26128
alock n verr
gain not used wexp
FLAGS n wbs
in n wnt
dp y
hs nn
DISPLAY
sp -80.0
wp 21803.3
vs 538
sc 0
wc 250
hzmm 87.22
is 500.00
rfl 2985.0
rfp 0
th 20
ins 100.000
na no ph

```

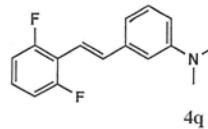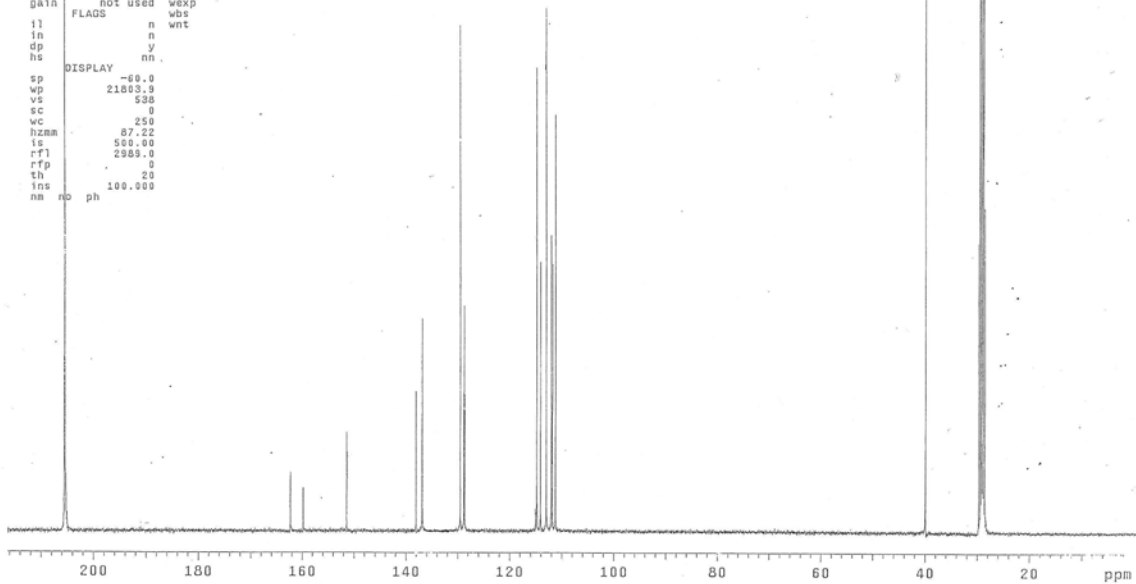

```

LMK-1-183
expl stdin
SAMPLE DEC. & VT
date Jul 28 2010 dfrq 399.719
solvent acetone dn H1
file exp dpwr 42
ACQUISITION exp dot 0
sfrq 399.719 dm nnn
tn H1 dms c
at 3.744 dmf 11148
np 44932 dseq
sw 6000.6 dres 1.0
fb 3000 homo n
bs 4 PROCESSING
tpwr 59 wfile ft
pr 7.3 proc not used
di 1.000 fn
tof 0 math f
nt 32
ct 32 werr
alock n wexp
gain not used wbs
FLAGS n wnt
il n
in n
dp y
hs nn
DISPLAY
sp -67.1
wp 4153.4
vs 290
sc 0
vc 250
hzam 16.01
is 423.70
rf1 995.0
rfp 0
th 54
ins 1.000
nm cdc ph

```

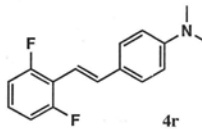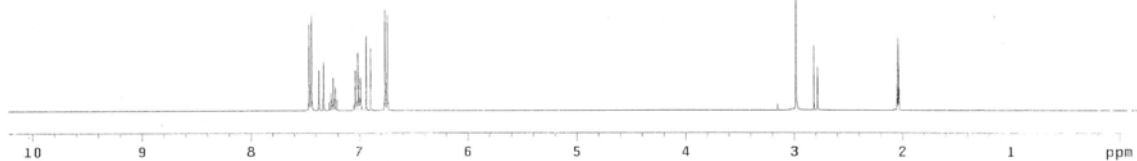

```

LMK-I-183
expl std13c
SAMPLE DEC. & VT
date Aug 1 2010 dfrq 399.719
solvent Acetone dn H1
file exp dpr 42
ACQUISITION dof 0
sfrq 100.519 dm yyy
tn C13 dm w
at 0.600 def 11148
np 40000 dseq
sw 25000 dres 1.0
fb 14000 homo n
ds 16 PROCESSING n
tpwr 55 lb 1.00
pw 6.0 wfile
dl 1.000 proc ft
tof 0 fa not used
nt 32000 math T
ct 17136
alock n verr
gain not used wexp
FLAGS n wbs
in n wnt
dp y
hs nn
DISPLAY
sp -2988.0
vp 25000.0
vs 1002
sc 0
wc 250
hzmm 100.00
ls 500.00
rfi 2988.0
rfp 0
th 4
ins 100.000
na no ph

```

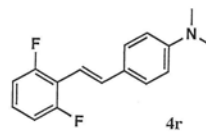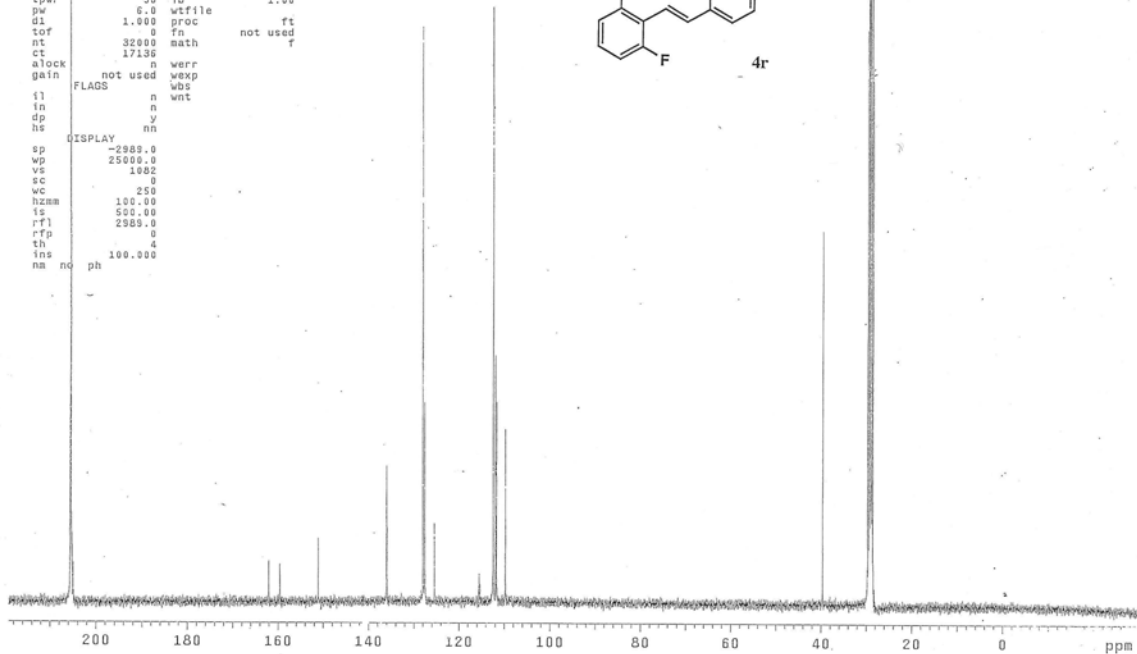

LMK-I-135

```
expl stdin
SAMPLE DEC. & VT
date Sep 15 2010 dfrq 399.719
solvent Acetone dn H1
file exp dpr 42
ACQUISITION exp dot 0
sfrq 399.719 dm nnn
tn H1 dm c
at 3.744 def 11148
np 44932 dseq
sw 6000.6 dres 1.0
rb 3000 homo n
bs 16 PROCESSING
tpwr 59 wtfil ft
pw 7.3 proc not used
d1 1.000 fn
tof 0 math f
nt 32
ct 32 werr
alock n wexp
gain not used wbs
FLAGS wnt
il n
in n
dp y
hs na
DISPLAY
sp 11.5
wp 4000.0
vs 144
sc 0
wc 250
hzmm 16.01
is 500.00
rf1 1810.0
rfp 819.4
th 6
ins 1.000
nm cdc ph
```

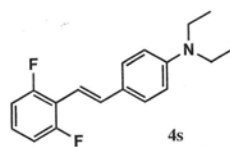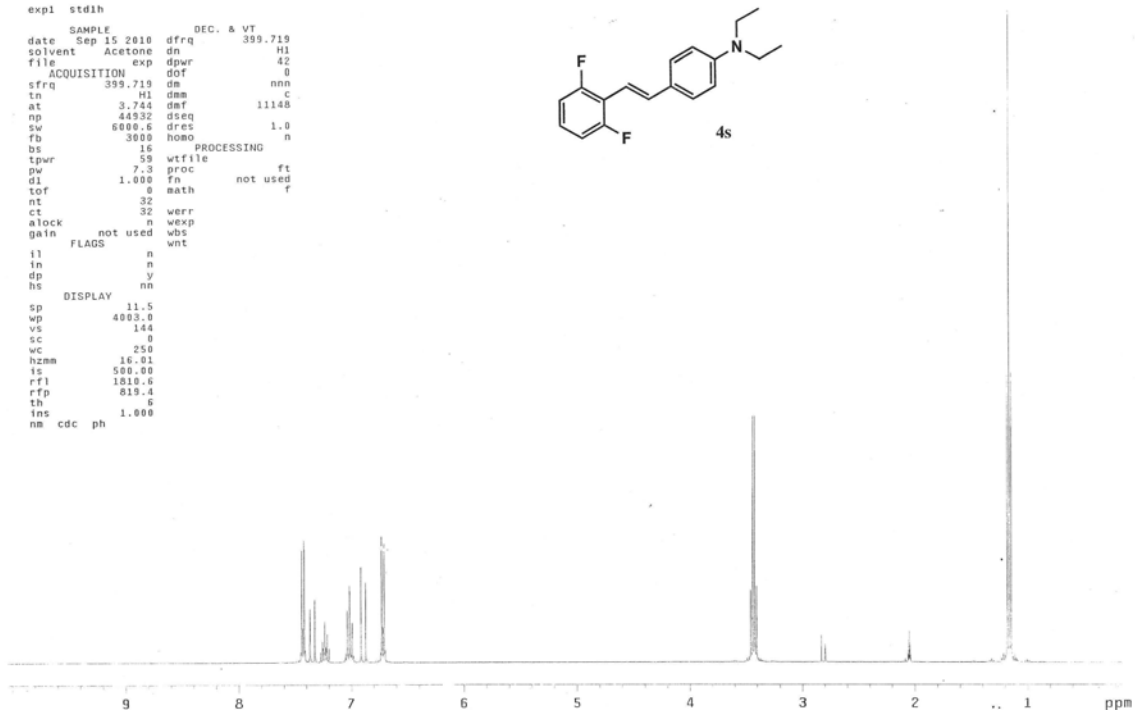

```

LMK-1-135
expl std13c
      SAMPLE      BEC. & VT
date Sep 15 2010 dfrq 399.719
solvent Acetone dn H1
file exp dpwr 42
      ACQUISITION  dof 0
sfrq 100.519 dm yyy
tn C13 dsm w
at 0.800 dmf 11148
np 40000 dseq 1.0
sw 25000.0 dres n
rb 14000 homo n
bs 16 PROCESSING n
tpwr 55 lb 1.00
pw 6.0 wtfile
di 1.000 proc ft
tof 0 fn not used
nt 32000 math f
ct 27104
alock a verr
gain not used wexp
      FLADS wbs
il n wnt
in n
dp y
hs nn
      DISPLAY
sp 122.3
wp 18082.2
vs 567
sc 0
wc 250
hzmm 72.33
fs 500.00
rf1 2989.0
rfp 0
th 20
ins 100.000
nm no ph

```

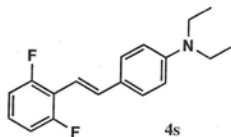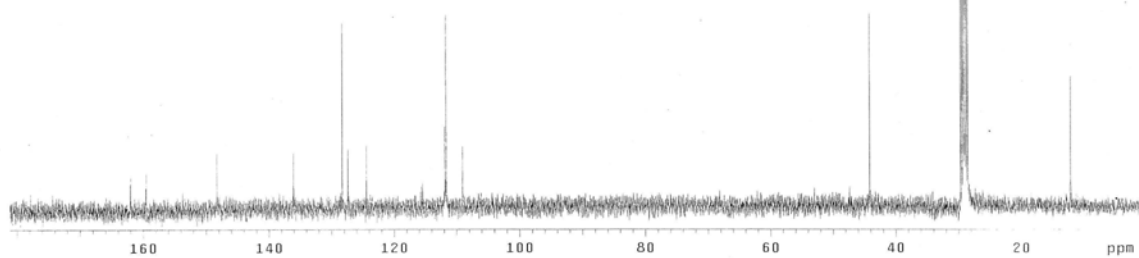

```

LMK-I-15
expl stdih
SAMPLE DEC. & VT
date Aug 14 2010 dfrq 399.719
solvent Acetone dn HI
file exp dpwr 42
ACQUISITION exp dof 0
sfrq 399.719 dm nnn
tn HI dnm c
at 3.744 dmf 11148
np 44932 dseq
sw 6000.6 dres 1.0
fd 3000 hobo n
bs 16 PROCESSING
tpwr 59 wtfle
pw 7.3 proc ft
d1 1.000 fn not used
tof 0 math f
nt 32
ct 32 werr
atlock n wexp
gain not used vbs
FLAGS nmt
il n
in n
dp y
hs nn
DISPLAY
sp -19.1
wp 4042.9
vs 144
sc 0
wc 250
hzmm 16.17
is 500.00
rf1 1001.7
rpf 0
th 59
ins 1.000
nm cdc ph

```

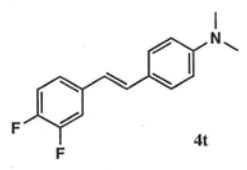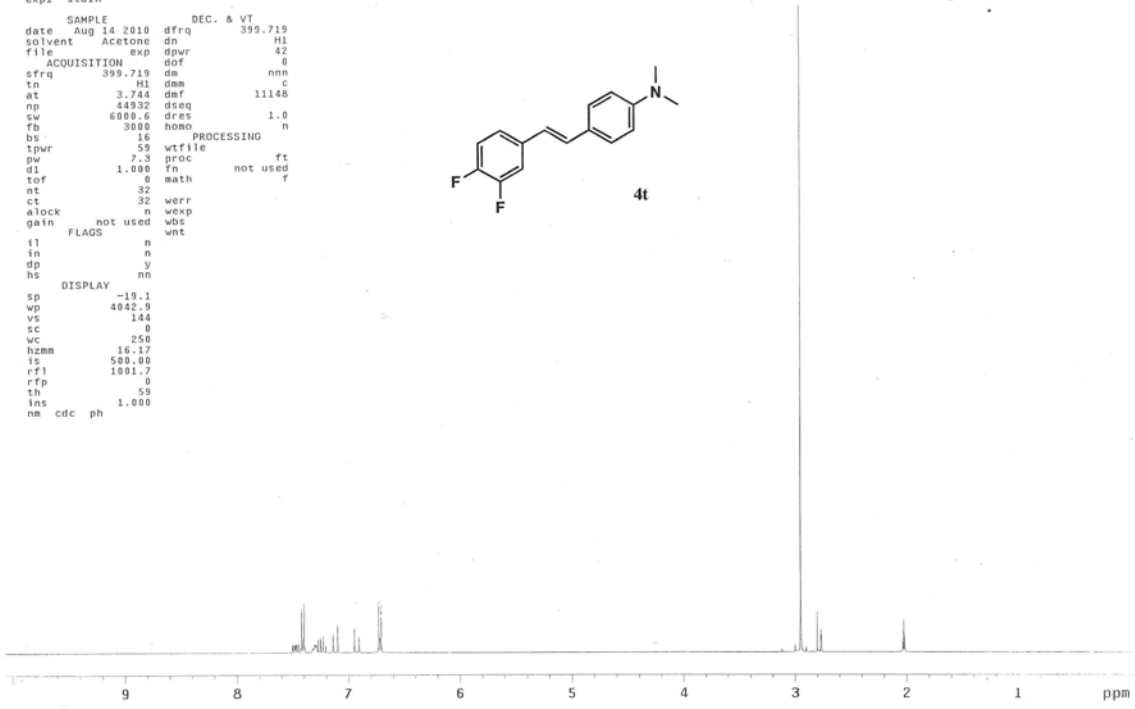



```

LMK-I-15
exp1 std13c
SAMPLE DEC. & VT
date Aug 14 2010 dfrq 399.719
solvent Acetone dn HI
file exp dpvr 42
ACQUISITION dcf 0
sfrq 100.519 dm yyy
tn C13 dnm w
at 0.000 dmf 11140
np 40000 dseq
sw 25000.0 dret 1.0
fb 14000 homo n
bs 16 PROCESSING
tpwr 56 lb 1.00
pd 6.0 wtfile
dl 1.000 proc ft
tof 0 fn not used
nt 32000 math f
ct 7584
alock n werr
gain not used wexp
flags n wbs
in n wnt
dp y
hs nn
DISPLAY
sp -326.3
wp 21704.0
vs 1392
sc 0
wc 250
hzmm 86.82
is 500.00
rf 2989.0
rpf 0
th 20
ins 100.000
nm no ph

```

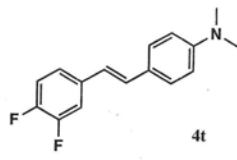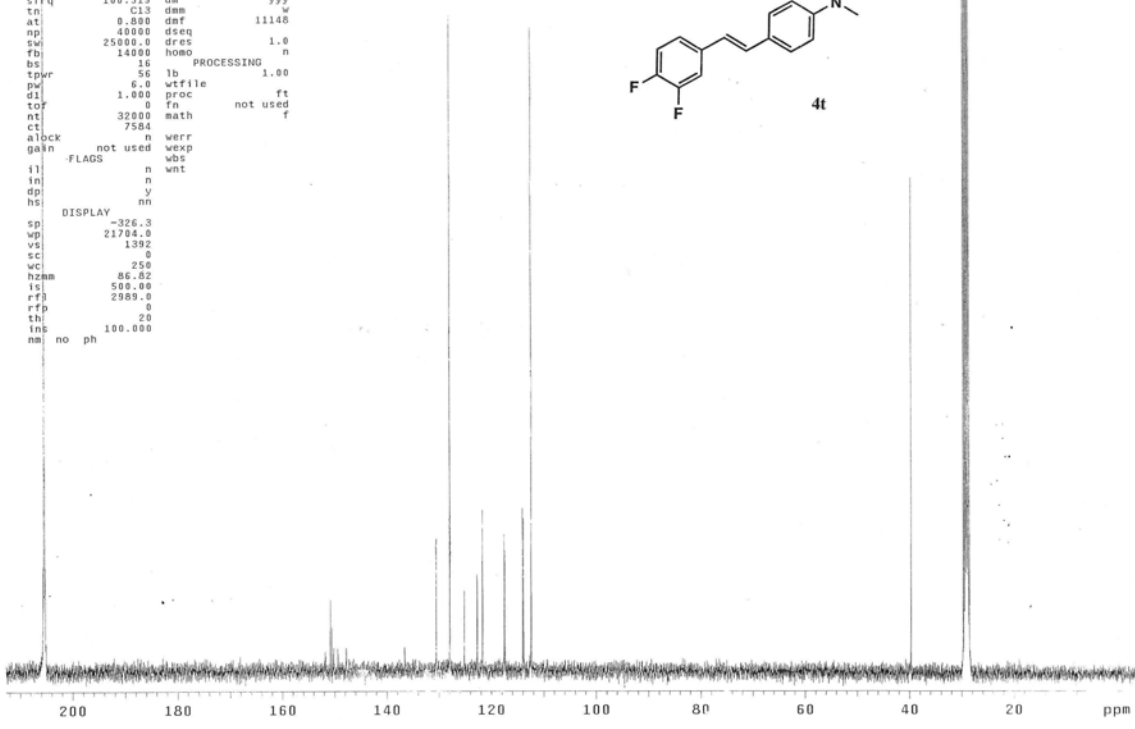

LMK-1-103

expl std1h

```
SAMPLE      DEC. & VT
date Aug 17 2010 dfrq 399.719
solvent Acetone dn H1
file exp dpr 42
ACQUISITION dof 0
sfrq 399.719 dm nnn
tn H1 dm C
at 3.744 dmf 11148
np 44932 dseq
sw 6000.6 dres 1.0
rb 3000 homo n
bs 16 PROCESSING n
tpwr 59 wtrfile
pw 7.3 proc ft
d1 1.000 fn not used
tof 0 math f
nt 32
ct 32 werr
alock n wexp
gain not used vbs
FLAGS not used wnt
il n
in n
dp y
hs nn
DISPLAY
sp -36.7
wp 4042.9
vs 144
sc 0
vc 250
hzem 16.17
is 500.00
rf1 1009.0
rfp 819.4
th 67
ins
nm cdc ph 1.000
```

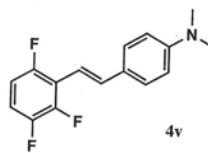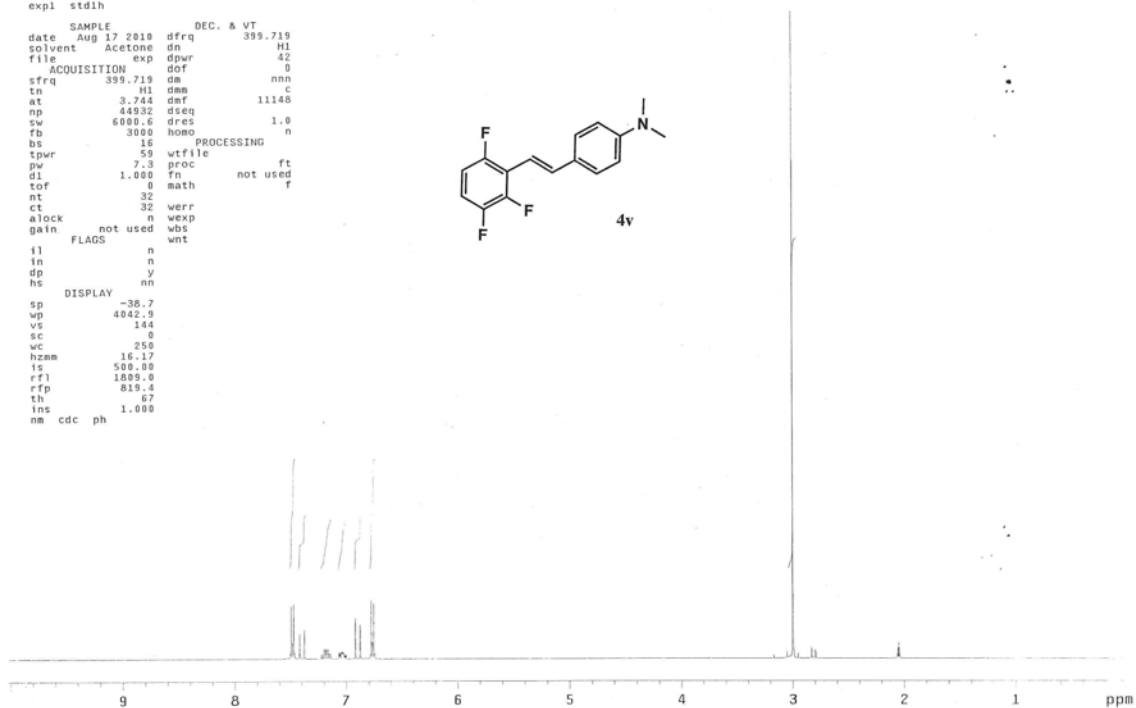

```

LMK-I-103
expl std13c
SAMPLE DEC. & VT
date Aug 17 2010 dfrq 399.719
solvent Acetone dn HI
file exp dpwr 42
ACQUISITION exp dof 0
sfrq 100.519 dm yyy
tn C13 dm w
at 0.000 daf 11148
np 40000 dseq
sw 25000.0 dres 1.0
fb 14000 homo n
bs 16 PROCESSING
tpwr 56 lb 1.00
pv 6.0 wtf file
d1 1.000 proc ft
tof 0 fn not used f
nt 32000 math
ct 27232
alock n werr
gain not used wexp
FLAGS n wbs
il n wnt
ln n
dp y
hs nn
DISPLAY
sp 6.4
wp 22003.0
vs 799
sc 0
wc 250
hzmm 88.02
is 500.00
rfl 2989.0
rfp 0
th 20
ins
nm no ph 100.000

```

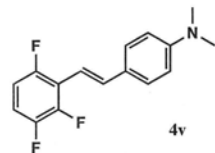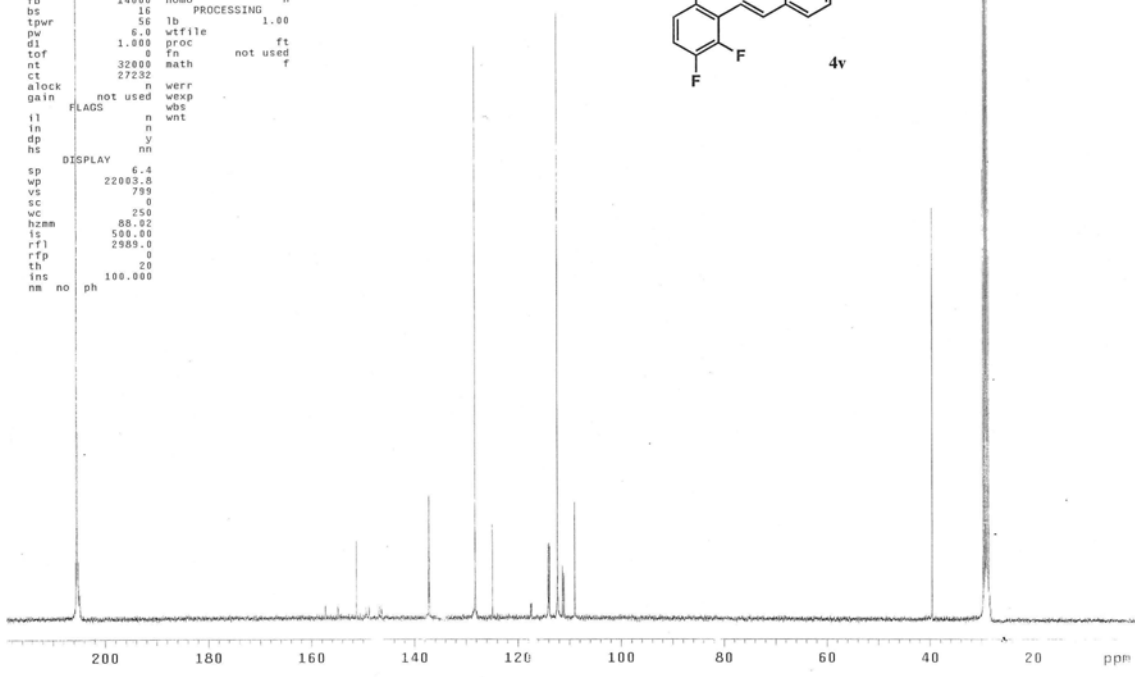

```

LMK-I-219
expl stdih
SAMPLE DEC. & VT
date Sep 11 2010 dfrq 399.719
solvent Acetone dn H1
file exp dpr 42
ACQUISITION exp dof 0
sfrq 399.719 da nnn
tn H1 dnm c
at 3.744 daf 11148
np 44932 dseq
sw 6000.6 dres 1.0
fb 300 hoso n
bs 16
tpwr 59 PROCESSING
pw 7.3 wtf file ft
d1 1.000 fn not used f
tof 0 math
nt 12
ct 12 werr
alock n wexp
gain not used wbs
FLAGS n wnt
il n
in n
dp y
hs nn
DISPLAY
sp -44.4
wp 4074.6
vs 256
sc 0
wc 250
hzmm 16.30
is 500.00
rfl 1810.8
rfp 819.4
th 20
ins 100.000
nm cdc ph

```

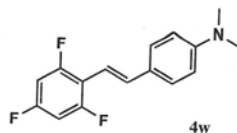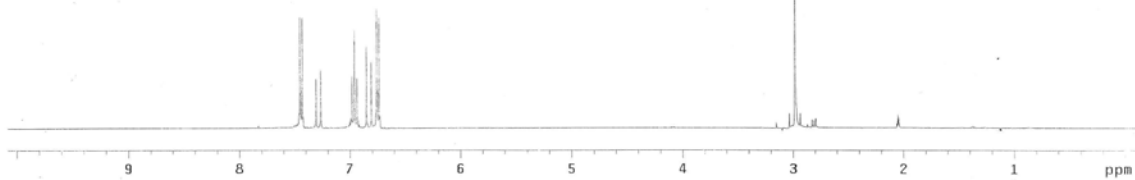

```

LMK-I-219
expl std13c
SAMPLE DEC. & VT
date Sep 18 2010 dfrq 399.719
solvent Acetone dn HI
file exp dpwr 42
ACQUISITION dof 0
sfrq 100.519 dm yyy
tn C13 dm w
at 0.800 daf 11148
np 40000 dseq
sw 25000.0 dres 1.0
fb 14000 homo n
bs 16 PROCESSING
tpwr 56 lb 1.00
pw 6.0 wfile
d1 1.000 proc ft
tof 0 fn not used f
nt 64000 math
ct 30032
alock n werr
gain not used wexp
FLAGS n wbs
in n wnt
dp y
hs nn
DISPLAY
sp -5.1
wp 21517.0
vs 001
sc 0
wc 250
hzmm 86.07
is 509.00
rfl 2989.0
rfp 0
th 20
ins 100.000
nm no ph

```

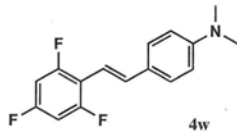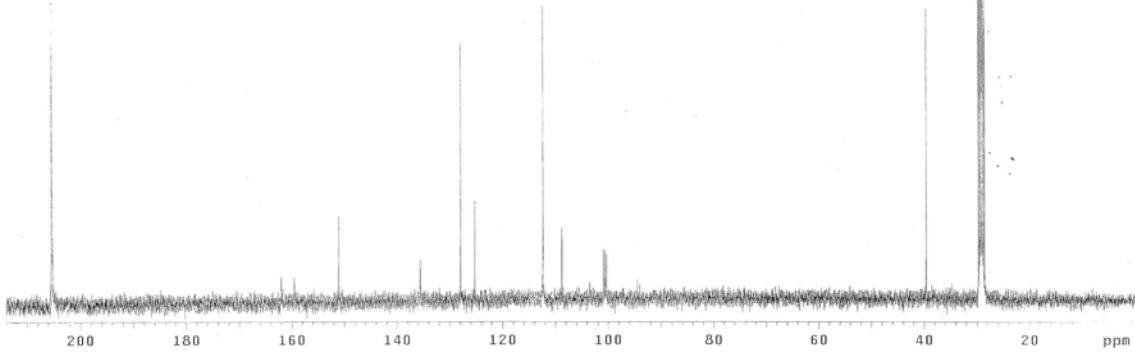

```

VMS-I-289
expl std1h
SAMPLE DEC. & VT
date Sep 3 2010 dfrq 399.719
solvent Acetone dn H1
file exp dpwr 42
ACQUISITION dof 0
strq 399.719 dm nnn
in H1 dsm c
at 3.744 dmf 11148
np 44932 dseq 1.0
sw 6000.6 dres n
fb 3000 homo n
bs 16 PROCESSING n
tpwr 59 wtrfile ft
pw 7.3 proc not used
dl 1.000 fn f
tof 0 math
nt 12
ct 12 verr
alock 0 wexp
gain not used wbs
FLAGS wnt
il n
in n
dp v
hs nm
DISPLAY
sp -35.9
wp 4002.5
vs 144
sc 0
wc 250
hzmm 16.33
fs 500.00
rfl 1001.7
rfp 0
th 6
ins 2.000
nm cdc ph

```

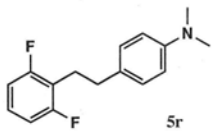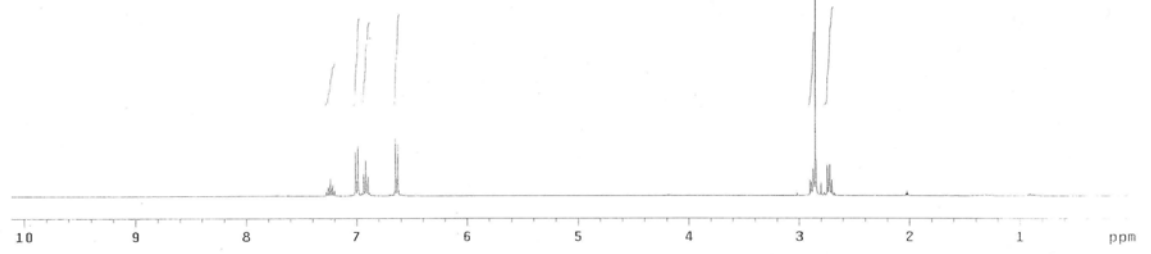

```

VMS-I-289
expl std13c
SAMPLE DEC. & VT
date Sep 3 2010 dfrq 399.719
solvent Acetone dn H1
file exp dpwr 42
ACQUISITION dof 0
sfrq 100.519 dm yyy
tn C13 dm w
at 0.800 dmf 11148
np 40000 dseq
sw 29000.0 dres 1.0
fb 14000 homo n
bs 16 PROCESSING
tpwr 56 lb 1.00
pv 6.0 wtfile
d1 1.000 proc ft
tof 0 fn not used f
nt 64000 math
ct 30336
alock n verr
gain not used wexp
FLAGS n wbs
il n wnt
in n
dp y
hs nn
DISPLAY
sp 94.1
wp 21816.9
vs 440
sc 0
wc 250
hzm 87.27
is 500.00
rfl 2989.0
rfp 0
th 20
ins
nm no ph 100.000

```

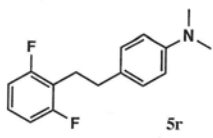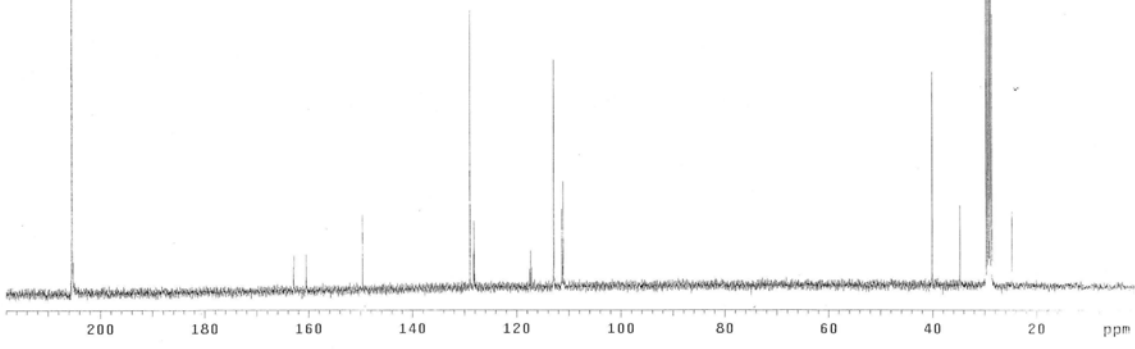

Supplement: NIHMS282945-supplement-1.pdf [file NIHMS282945-supplement-1.pdf]
